# Supplementary material for: Modelling reveals novel roles of two parallel signalling pathways and homeostatic feedbacks in yeast
Source: PubMed Central journal article supplement — Mol Syst Biol. 2012 Nov 13;8:622. doi: 10.1038/msb.2012.53 (PMC3531907; doi:10.1038/msb.2012.53), 2012-11-13
Supplement: msb201253-s1.pdf [file msb201253-s1.pdf]

# **Modelling reveals novel roles of two parallel signalling pathways and homeostatic feedbacks in yeast**

## **Supplementary Information**

Jörg Schaber<sup>1\*</sup>, Rodrigo Baltanas<sup>2&</sup>, Alan Bush<sup>2&</sup>, Edda Klipp<sup>3\*</sup>, Alejandro Colman-Lerner<sup>2</sup>

<sup>1</sup> Institute for Experimental Internal Medicine, Medical Faculty, Otto von Guericke University, Magdeburg, Germany

<sup>2</sup> Instituto de Fisiología, Biología Molecular y Neurociencias, Consejo Nacional de Investigaciones Científicas y Técnicas y Facultad de Ciencias Exactas y Naturales, Universidad de Buenos Aires, Buenos Aires, Argentina.

<sup>3</sup> Theoretical Biophysics, Department of Biology, Humboldt University, Berlin, Germany

& Equal contribution

\* To whom correspondence should be addressed:

Jörg Schaber  
Email: schaber@med.ovgu.de

Edda Klipp  
Email: edda.klipp@rz.hu-berlin.de

## Table of Content

|                                                                                                                                                                                                                                                                                                                                    |    |
|------------------------------------------------------------------------------------------------------------------------------------------------------------------------------------------------------------------------------------------------------------------------------------------------------------------------------------|----|
| Table of Content .....                                                                                                                                                                                                                                                                                                             | 2  |
| 1 Model description and selection .....                                                                                                                                                                                                                                                                                            | 5  |
| <b>Table S1:</b> State variables and their initial conditions. 0 indicate initial concentrations in the osmotically active volume.....                                                                                                                                                                                             | 5  |
| <b>Table S2:</b> Initial conditions derived from the steady-state assumption. 0 indicate initial concentrations. Bold parameters are free parameters that are estimated from data. ....                                                                                                                                            | 7  |
| <b>Table S3:</b> Ordinary differential equation system of the master model. Rates and subscripts in { } indicate optional reactions depending on the candidate model. Volumes are in fl, concentrations in $\mu\text{M}$ and pressure in MPa.....                                                                                  | 8  |
| <b>Table S4:</b> Rate equations of the master model. Concentrations are denoted by []. Bold parameters are free parameters that are estimated from data. The other parameters and auxiliary variables are described in Table S5 and S6, respectively. Volumes are in fl, concentrations in $\mu\text{M}$ and pressure in MPa. .... | 9  |
| <b>Table S5:</b> Auxiliary parameters and variables. Concentrations are denoted by []. Bold parameters are free parameters that are estimated from data. Volumes are in fl, concentrations in $\mu\text{M}$ and pressures in MPa. ....                                                                                             | 12 |
| <b>Table S6:</b> Constants used in the models.....                                                                                                                                                                                                                                                                                 | 15 |
| <b>Table S7:</b> Estimated parameter values $\pm$ asymptotic standard deviation for the best approximating model (Nr. 22).....                                                                                                                                                                                                     | 16 |
| <b>Table S8:</b> First ten candidate models according to AICc using both fitted and predicted SSR including models with oscillations.....                                                                                                                                                                                          | 17 |
| <b>Table S9:</b> First ten candidate models according to AICc using only fitted SSR excluding models with oscillations.....                                                                                                                                                                                                        | 18 |
| <b>Table S10:</b> First ten candidate models according to AICc using using both fitted and predicted SSR excluding models with oscillations. ....                                                                                                                                                                                  | 18 |
| 2 Saturation and inhibition kinetics .....                                                                                                                                                                                                                                                                                         | 19 |
| 3 Frequency Response .....                                                                                                                                                                                                                                                                                                         | 21 |
| <b>Figure S1:</b> Simulated Hog1 phosphorylation for consecutive shocks of 0.2M of the indicated periods $P_0$ . The parts of the simulations marked in red were taken for the calculation of the response amplitude $A(\omega)$ . ....                                                                                            | 21 |
| <b>Figure S2:</b> Measured Hog1 nuclear localisation after consecutive shocks of 0.2M of the indicated periods $P_0$ (data digitised from Figure S2 in Mettetal et al. (2009)). The parts of the simulations marked in red were taken for the calculation of the response amplitude $A(\omega)$ . ....                             | 22 |
| <b>Figure S3:</b> Response amplitude $A(\omega)$ vs. frequency $\omega$ for the simulation (Figure S1) and the re-analysed data from Mettetal et al. (2009) (Figure S2). Note the for                                                                                                                                              |    |

|     |                                                                                                                                                                                                                                                                                                                                                                                                                                                                                                                                                                                                                                                                                                                                       |    |
|-----|---------------------------------------------------------------------------------------------------------------------------------------------------------------------------------------------------------------------------------------------------------------------------------------------------------------------------------------------------------------------------------------------------------------------------------------------------------------------------------------------------------------------------------------------------------------------------------------------------------------------------------------------------------------------------------------------------------------------------------------|----|
|     | the data (left panel) $A(\omega)$ of Hog1 nuclear localisation is shown, whereas for the simulation (right panel) $A(\omega)$ of Hog1 phosphorylation is shown.....                                                                                                                                                                                                                                                                                                                                                                                                                                                                                                                                                                   | 22 |
| 4   | Model sensitivities .....                                                                                                                                                                                                                                                                                                                                                                                                                                                                                                                                                                                                                                                                                                             | 23 |
|     | <b>Table S11:</b> Kinetic rates law tested for reaction $v_{13}$ .....                                                                                                                                                                                                                                                                                                                                                                                                                                                                                                                                                                                                                                                                | 23 |
|     | <b>Table S12:</b> Model discrimination analysis for different kinetic rate laws for reaction $v_{13}$ using the three best approximating models Nr. 22, 78 and 30. ....                                                                                                                                                                                                                                                                                                                                                                                                                                                                                                                                                               | 23 |
|     | <b>Table S13:</b> Maximum of absolute sensitivities of the 95% volume adaptation times upon 0.4 M NaCl osmotic shock .....                                                                                                                                                                                                                                                                                                                                                                                                                                                                                                                                                                                                            | 24 |
| 5   | Likelihood profiles.....                                                                                                                                                                                                                                                                                                                                                                                                                                                                                                                                                                                                                                                                                                              | 25 |
|     | <b>Figure S4:</b> Likelihood profiles for the fitted parameters of Model 22 (Table S7). Black line: Re-fitted <i>SSR</i> for the parameter indicated in the plot label. Black point: original parameter value with the original <i>SSR</i> . Red line: original <i>SSR</i> of Model 22. Blue line: 95% confidence level, according to the approximate ellipsoidal $100(1-\alpha)\%$ confidence region for $p$ :<br>$P_{CR} = \left\{ p : SSR(p) \leq SSR(\hat{p}) \left( 1 + \frac{m}{n-m} F_{m,n-m}^{\alpha} \right) \right\}$ . $F_{m,n-m}^{\alpha}$ is the upper $\alpha$ -critical value for the $F_{m,n-m}$ -distribution, where $m$ is the number of parameters and $n$ the number of data points (Seber and Wild, 2003). ..... | 26 |
| 6   | Adaptation times .....                                                                                                                                                                                                                                                                                                                                                                                                                                                                                                                                                                                                                                                                                                                | 26 |
| 7   | The simplified HOG model .....                                                                                                                                                                                                                                                                                                                                                                                                                                                                                                                                                                                                                                                                                                        | 27 |
| 7.1 | Ordinary differential equation system .....                                                                                                                                                                                                                                                                                                                                                                                                                                                                                                                                                                                                                                                                                           | 27 |
| 7.2 | Initial conditions and derived quantities .....                                                                                                                                                                                                                                                                                                                                                                                                                                                                                                                                                                                                                                                                                       | 27 |
| 7.3 | Bifurcation Diagrams.....                                                                                                                                                                                                                                                                                                                                                                                                                                                                                                                                                                                                                                                                                                             | 27 |
|     | <b>Figure S5:</b> Bifurcation diagrams of the simplified HOG model including different feedbacks. The abscissa shows $T_0$ and the ordinate shows equilibria of <i>Hog1PP</i> . Solid lines indicate stable equilibria, dotted lines indicate unstable equilibria, solid circles indicate the amplitude of stable oscillations. The colours indicate different NaCl conditions: Blue: 0 M NaCl, red: 0.5M NaCl, black: 1 M NaCl. See also Figure 9 in the main text. ....                                                                                                                                                                                                                                                             | 28 |
| 8   | The model correctly predicts effect of wild type and single branch inhibition ...                                                                                                                                                                                                                                                                                                                                                                                                                                                                                                                                                                                                                                                     | 29 |
|     | <b>Figure S6:</b> Simulated Sho1 branch mutants mimicking experiments done in Hao et al. (2007), Compare to Figure 5B therein. FB denotes feedback.....                                                                                                                                                                                                                                                                                                                                                                                                                                                                                                                                                                               | 29 |
| 9   | Direct non-transcriptional modification of glycerol production by Hog1 is the main mechanism responsible for Hog1 phosphorylation upon inhibition of Hog1 activity.....                                                                                                                                                                                                                                                                                                                                                                                                                                                                                                                                                               | 29 |
|     | <b>Figure S7:</b> Simulated branch activations where only one of several feedback mechanisms (FB) is active at a time for the Sln1 branch and the Sho1 branch, respectively. ....                                                                                                                                                                                                                                                                                                                                                                                                                                                                                                                                                     | 29 |

|    |                                                                                                                                                                                                                                                                                                                                                                                            |    |
|----|--------------------------------------------------------------------------------------------------------------------------------------------------------------------------------------------------------------------------------------------------------------------------------------------------------------------------------------------------------------------------------------------|----|
| 10 | The two branches compete for Pbs2, but are partly additive.....                                                                                                                                                                                                                                                                                                                            | 30 |
|    | <b>Figure S8:</b> Pbs2 distribuiton and Hog1 activation for both branches and the wild type for 0.1 M NaCl. <b>A:</b> Pbs2 distribuiton Sln1-branch (ste50Δ) simulation. <b>B:</b> Pbs2 distribuiton Sho1 (Ssk2Δ Ssk22Δ) branch simulation. <b>C:</b> Pbs2 distribution wild type simulation. <b>D:</b> Activation Hog1 simulation for both branches and the wild type for 0.1 M NaCl..... | 30 |
|    | <b>Figure S9:</b> Pbs2 distribuiton and Hog1 activation for both branches and the wild type for 0.4 M NaCl. <b>A:</b> Pbs2 distribuiton Sln1-branch (ste50Δ) simulation. <b>B:</b> Pbs2 distribuiton Sho1 (Ssk2Δ Ssk22Δ) branch simulation. <b>C:</b> Pbs2 distribution wild type simulation. <b>D:</b> Activated Hog1 simulation for both branches and the wild type for 0.4 M NaCl.....  | 31 |
| 11 | There is no perfect adaptation at the level of Hog1 phosphorylation .....                                                                                                                                                                                                                                                                                                                  | 32 |
|    | <b>Figure S10:</b> Dynamics of gradients and flows characterising osmolarity and glycerol in yeast upon an osmotic shock of 0.4 M NaCl scaled to maximum levels, respectively.....                                                                                                                                                                                                         | 32 |
| 12 | References.....                                                                                                                                                                                                                                                                                                                                                                            | 33 |
| 13 | Supplementary Data.....                                                                                                                                                                                                                                                                                                                                                                    | 33 |

## 1 Model description and selection

The final selected model (Model Nr. 22, Supplementary Tables S8-S10) can be downloaded as a COPASI-file (Version 4.7, Build 34) from the Online Supplementary Material, zipped together with the corresponding data for fitting and prediction (Figure 2, 3A and 3B in the main text). COPASI is freely available from [www.COPASI.org](http://www.COPASI.org). Extract the model and the data files into a common folder and the model fits and predictions can be reproduced by running the parameter estimation task with the method ‘Current Solution Statistics’.

**Table S1:** State variables and their initial conditions.  $[ ]_0$  indicate initial concentrations in the osmotically active volume.

| Component             | Initial Condition                         | Remark                                                                                                                                                                                                               |
|-----------------------|-------------------------------------------|----------------------------------------------------------------------------------------------------------------------------------------------------------------------------------------------------------------------|
| $V_{os}$ [fl]         | 29.5                                      | Osmotically active volume, derived from a total cell volume of 50 fl and a solid base volume of 41%.                                                                                                                 |
| $Pbs2$ [ $\mu$ M]     | $Pbs2_t - [Pbs2P]_0 - [Sho1Pbs1]_0$       | MAP kinase kinase                                                                                                                                                                                                    |
| $Pbs2P$ [ $\mu$ M]    | see Table S2                              | Activated MAP kinase kinase (Sln1 branch). Initial condition set such that a steady state of Hog1 phosphorylation is maintained.                                                                                     |
| $Sho1$ [ $\mu$ M]     | $Sho1_t - [Sho1Pbs1]_0$                   | One of the putative upstream sensors                                                                                                                                                                                 |
| $Sho1Pbs2$ [ $\mu$ M] | see Table S2                              | Active scaffold complex (Sho1 branch). Initial condition set such that a steady state of Hog1 phosphorylation is maintained.                                                                                         |
| $Hog1$ [ $\mu$ M]     | $Hog1_t - [Hog1P]_0 - [Hog1PP]_0$         | MAP kinase                                                                                                                                                                                                           |
| $Hog1P$ [ $\mu$ M]    | see Table S2                              | Single phosphorylated MAP kinase. Initial condition set such that a steady state of Hog1 phosphorylation is maintained.                                                                                              |
| $Hog1PP$ [ $\mu$ M]   | $\frac{Hog1_t \cdot 2.23 \cdot f_n}{100}$ | Double phosphorylated, i.e. active, MAP kinase. It was derived from data that 2.23 % of the maximal phosphorylation is the steady state activation. $f_n$ is the fraction in the nucleus at maximal phosphorylation. |
| $RNA$ [ $\mu$ M]      | 0.034                                     | Placeholder for transcribed genes. Initial value derived from                                                                                                                                                        |

---

|                                           |                    |                                                                                                                                                                                                                                                           |
|-------------------------------------------|--------------------|-----------------------------------------------------------------------------------------------------------------------------------------------------------------------------------------------------------------------------------------------------------|
|                                           |                    | data, i.e. initial percentage of maximum.                                                                                                                                                                                                                 |
| <i>Protein</i> [ $\mu\text{M}$ ]          | 0.043              | Placeholder for Hog1-dependent proteins, especially Gpd1. Initial value derived from measured number of Gpd1 molecules (807, <a href="http://yeastgfp.yeastgenome.org">http://yeastgfp.yeastgenome.org</a> )                                              |
| <i>Gly<sub>in</sub></i> [ $\mu\text{M}$ ] | 180000             | Intracellular glycerol, approximated by assuming a measured value of 0.1 mM/OD in 1 ml sample (Klipp, et al., 2005) and assuming $18 \cdot 10^6$ cells per ml sample culture and an average osmotic cell volume of 29.5 fl, i.e. $1/18/29.5 \cdot 10^8$ . |
| <i>Gly<sub>ex</sub></i> [ $\mu\text{M}$ ] | 1800               | Extracellular glycerol, assumed to be 100 times lower than <i>Gly<sub>in</sub></i> .                                                                                                                                                                      |
| <i>Fps1</i> [ $\mu\text{M}$ ]             | $\frac{Fps1_t}{2}$ | Membrane bound open form of aquaglyceroporin Fps1 (assumed to be independent from volume change). Initially half of the channels is assumed to be open.                                                                                                   |
| <i>Fps1P</i> [ $\mu\text{M}$ ]            | $\frac{Fps1_t}{2}$ | Membrane bound closed form of aquaglyceroporin Fps1 (assumed to be independent from volume change). Initially half of the channels is assumed to be closed.                                                                                               |
| <i>Phosphatase</i> [ $\mu\text{M}$ ]      | 0.043              | Placeholder for phosphatases like Ppt1/2/3 and others. Initial value derived from measured number of Ptp3 molecules (769, <a href="http://yeastgfp.yeastgenome.org">http://yeastgfp.yeastgenome.org</a> )                                                 |

---

**Table S2:** Initial conditions derived from the steady-state assumption.  $[ ]_0$  indicate initial concentrations. Bold parameters are free parameters that are estimated from data.

| Component      | Initial Condition                                                                                                                                                                                                                                                                                                                                                     |
|----------------|-----------------------------------------------------------------------------------------------------------------------------------------------------------------------------------------------------------------------------------------------------------------------------------------------------------------------------------------------------------------------|
|                | If both branches are active:                                                                                                                                                                                                                                                                                                                                          |
|                | $-\left(4 \cdot \mathbf{k}_{Hog1phos1} \cdot ([Hog1PP]_0 - Hog1_t)\right)^{-1} \left(\mathbf{k}_{Hog1dephos} \cdot [Phosphatase]_0 \cdot [Hog1PP]_0 + \sqrt{[Hog1PP]_0 \cdot (4 \cdot Hog1_t - 3 \cdot [Hog1PP]_0)}\right)$                                                                                                                                           |
|                | If only the Sln1 branch is active ( $k_3=0$ ):                                                                                                                                                                                                                                                                                                                        |
| <i>Pbs2P</i>   | $-\left(2 \cdot \mathbf{k}_{Hog1phos1}^2 \cdot ([Hog1PP]_0 - Hog1_t)\right)^{-1} \left(\mathbf{k}_{Hog1phos1} \cdot \mathbf{k}_{Hog1dephos} \cdot [Phosphatase]_0 \cdot [Hog1PP]_0 + \sqrt{(\mathbf{k}_{Hog1phos1} \cdot \mathbf{k}_{Hog1dephos} \cdot [Phosphatase]_0)^2 \cdot [Hog1PP]_0 \cdot (4 \cdot Hog1_t - 3 \cdot [Hog1PP]_0)}\right)$                       |
|                | If only the Sho1 branch is active ( $k_1=0$ ):                                                                                                                                                                                                                                                                                                                        |
|                | 0                                                                                                                                                                                                                                                                                                                                                                     |
|                | If both branches are active:                                                                                                                                                                                                                                                                                                                                          |
|                | $-\left(4 \cdot \mathbf{k}_{Hog1phos2} \cdot ([Hog1PP]_0 - Hog1_t)\right)^{-1} \left(\mathbf{k}_{Hog1dephos} \cdot [Phosphatase]_0 \cdot [Hog1PP]_0 + \sqrt{[Hog1PP]_0 \cdot (4 \cdot Hog1_t - 3 \cdot [Hog1PP]_0)}\right)$                                                                                                                                           |
|                | If only the Sho1 branch is active ( $k_1=0$ ):                                                                                                                                                                                                                                                                                                                        |
| <i>Sho1Pbs</i> | $-\left(2 \cdot \mathbf{k}_{Hog1phos2}^2 \cdot ([Hog1PP]_0 - Hog1_t)\right)^{-1} \left(\mathbf{k}_{Hog1phos2} \cdot \mathbf{k}_{Hog1dephos} \cdot [Phosphatase]_0 \cdot [Hog1PP]_0 + \sqrt{(\mathbf{k}_{Hog1phos2} \cdot \mathbf{k}_{Hog1dephos} \cdot [Phosphatase]_0)^2 \cdot [Hog1PP]_0 \cdot (4 \cdot Hog1_t - 3 \cdot [Hog1PP]_0)}\right)$                       |
|                | If only the Sln1 branch is active ( $k_3=0$ ):                                                                                                                                                                                                                                                                                                                        |
|                | 0                                                                                                                                                                                                                                                                                                                                                                     |
|                | If both branches are active:                                                                                                                                                                                                                                                                                                                                          |
|                | $\frac{1}{2} \left(-[Hog1PP]_0 + \sqrt{[Hog1PP]_0 \cdot (4 \cdot Hog1_t - 3 \cdot [Hog1PP]_0)}\right)$                                                                                                                                                                                                                                                                |
|                | If only the Sln1 branch is active ( $k_3=0$ ):                                                                                                                                                                                                                                                                                                                        |
| <i>Hog1P</i>   | $\left(2 \cdot \mathbf{k}_{Hog1phos1} \cdot \mathbf{k}_{Hog1dephos} \cdot [Phosphatase]_0\right)^{-1} \left(-\mathbf{k}_{Hog1phos1} \cdot \mathbf{k}_{Hog1dephos} \cdot [Phosphatase]_0 \cdot [Hog1PP]_0 + \sqrt{(\mathbf{k}_{Hog1phos1} \cdot \mathbf{k}_{Hog1dephos} \cdot [Phosphatase]_0)^2 \cdot [Hog1PP]_0 \cdot (4 \cdot Hog1_t - 3 \cdot [Hog1PP]_0)}\right)$ |
|                | If only the Sho1 branch is active ( $k_1=0$ ):                                                                                                                                                                                                                                                                                                                        |
|                | $\left(2 \cdot \mathbf{k}_{Hog1phos2} \cdot \mathbf{k}_{Hog1dephos} \cdot [Phosphatase]_0\right)^{-1} \left(-\mathbf{k}_{Hog1phos2} \cdot \mathbf{k}_{Hog1dephos} \cdot [Phosphatase]_0 \cdot [Hog1PP]_0 + \sqrt{(\mathbf{k}_{Hog1phos2} \cdot \mathbf{k}_{Hog1dephos} \cdot [Phosphatase]_0)^2 \cdot [Hog1PP]_0 \cdot (4 \cdot Hog1_t - 3 \cdot [Hog1PP]_0)}\right)$ |

**Table S3:** Ordinary differential equation system of the master model. Rates and subscripts in { } indicate optional reactions depending on the candidate model. Volumes are in fl, concentrations in  $\mu\text{M}$  and pressure in MPa.

---

**ODEs**


---

$$\frac{dV_{os}}{dt} = -L_p \cdot A \cdot (Turgor + f_{c2p} \cdot R \cdot T \cdot (Osm_{ex} - Osm_{in}))$$

$$\frac{d([Pbs2] \cdot V_{os})}{dt} = V_{os} \cdot (-\{v_1, v_{1,fb}\} + v_2 - \{v_3, v_{3,fb}\} + v_4)$$

$$\frac{d([Pbs2P] \cdot V_{os})}{dt} = V_{os} \cdot (\{v_1, v_{1,fb}\} - v_2)$$

$$\frac{d([Sho1] \cdot V_{os})}{dt} = V_{os} \cdot (-\{v_3, v_{3,fb}\} + v_4)$$

$$\frac{d([Sho1Pbs2] \cdot V_{os})}{dt} = V_{os} \cdot (\{v_3, v_{3,fb}\} - v_4)$$

$$\frac{d([Hog1] \cdot V_{os})}{dt} = V_{os} \cdot (-v_5 + v_6)$$

$$\frac{d([Hog1P] \cdot V_{os})}{dt} = V_{os} \cdot (v_5 - v_6 - v_7 + v_8)$$

$$\frac{d([Hog1PP] \cdot V_{os})}{dt} = V_{os} \cdot (v_7 - v_8)$$

$$\frac{d([RNA] \cdot V_{os})}{dt} = V_{os} \cdot (v_9 - v_{10})$$

$$\frac{d([Protein] \cdot V_{os})}{dt} = V_{os} \cdot (v_9 - v_{10})$$

$$\frac{d([Gly_{in}] \cdot V_{os})}{dt} = V_{os} \cdot v_{13} - v_{14}$$

$$\frac{d([Gly_{ex}] \cdot V_{ex})}{dt} = v_{14}$$

$$\frac{d[Fps1]}{dt} = -\{v_{15_1}, v_{15_2}, v_{15_3}, v_{15_4}, v_{15_5}\} \\ + \{v_{16_1}, v_{16_2}, v_{16_3}, v_{16_4}, v_{16_5}, v_{16_6}, v_{16_7}, v_{16_8}\}$$

$$\frac{d[Fps1P]}{dt} = \{v_{15_1}, v_{15_2}, v_{15_3}, v_{15_4}, v_{15_5}\} \\ - \{v_{16_1}, v_{16_2}, v_{16_3}, v_{16_4}, v_{16_5}, v_{16_6}, v_{16_7}, v_{16_8}\}$$

$$\frac{d([Phosphatase] \cdot V_{os})}{dt} = 0$$


---



**Table S4:** Rate equations of the master model. Concentrations are denoted by []. Bold parameters are free parameters that are estimated from data. The other parameters and auxiliary variables are described in Table S5 and S6, respectively. Volumes are in fl, concentrations in  $\mu\text{M}$  and pressure in MPa.

| Rate       | Rate equation                                                                                                  | Description and Rationale                                                                                                                               |
|------------|----------------------------------------------------------------------------------------------------------------|---------------------------------------------------------------------------------------------------------------------------------------------------------|
| $v_1$      | $k_1 \cdot Sln1_{Activ} \cdot [Pbs2]$                                                                          | Simple cell surface area dependent linear activation of Pbs2 through the Sln1 branch.                                                                   |
| $v_{1,fb}$ | $\frac{k_1 \cdot Sln1_{Activ\_fb} \cdot [Pbs2]}{1 + \left(\frac{[Hog1PP]}{K_{i,1}}\right)^{h_1}}$              | Simple cell surface area dependent linear activation of Pbs2 through the Sln1 branch, with transient inhibition by activated Hog1.                      |
| $v_2$      | $k_2 \cdot [Phosphatase] \cdot [Pbs2P]$                                                                        | Constitutive phosphatase dependent deactivation.                                                                                                        |
| $v_3$      | $k_3 \cdot Sho1_{Activ} \cdot [Pbs2] \cdot [Sho1]$                                                             | Simple cell surface area dependent binding of Pbs2 to Sho1. The complex is supposed to be the active form.                                              |
| $v_{3,f}$  | $\frac{k_3 \cdot Sho1_{Activ\_fb} \cdot [Pbs2] \cdot [Sho1]}{1 + \left(\frac{[Hog1PP]}{K_{i,3}}\right)^{h_3}}$ | Simple cell surface area dependent binding of Pbs2 to Sho1. The complex is supposed to be the active form. With transient inhibition by activated Hog1. |
| $v_4$      | $k_4 \cdot [Sho1Pbs2P]$                                                                                        | Constitutive dissociation of the scaffold complex.                                                                                                      |
| $v_5$      | $k_{Hog1phos1} \cdot [Sho1Pbs2] \cdot [Hog1] + k_{Hog1phos2} \cdot [Pbs2P] \cdot [Hog1]$                       | Linear phosphorylation of Hog1 by either the scaffold complex (Sho1-branch) or activated Pbs2 (Sln1-branch).                                            |
| $v_6$      | $k_{Hog1dephos} \cdot [Phosphatase] \cdot [Hog1P]$                                                             | Constitutive phosphatase dependent dephosphorylation.                                                                                                   |
| $v_7$      | $k_{Hog1phos1} \cdot [Sho1Pbs2] \cdot [Hog1P] + k_{Hog1phos2} \cdot [Pbs2P] \cdot [Hog1P]$                     | Linear phosphorylation of Hog1 by either the scaffold complex (Sho1-branch) or activated Pbs2 (Sln1-                                                    |

---

|                               |                                                                                                                                |                                                                                                                                                                                                                                                       |
|-------------------------------|--------------------------------------------------------------------------------------------------------------------------------|-------------------------------------------------------------------------------------------------------------------------------------------------------------------------------------------------------------------------------------------------------|
|                               |                                                                                                                                | branch).                                                                                                                                                                                                                                              |
| v <sub>8</sub>                | $k_{Hog1dephos} \cdot [Phosphatase] \cdot [Hog1PP]$                                                                            | Constitutive phosphatase dependent de-phosphorylation.                                                                                                                                                                                                |
| v <sub>9</sub>                | $\frac{k_9 \cdot [Hog1PP]}{Km_9 + [Hog1PP]}$                                                                                   | Gene transcription. Hog1 mediated transcription also involves other proteins that are potentially limiting a saturation kinetic is assumed.                                                                                                           |
| v <sub>10</sub>               | $k_{10} \cdot [RNA]$                                                                                                           | mRNA degradation                                                                                                                                                                                                                                      |
| v <sub>11</sub>               | $k_{11} \cdot [RNA]$                                                                                                           | Protein/enzyme production                                                                                                                                                                                                                             |
| v <sub>12</sub>               | $k_{12} \cdot [Protein]$                                                                                                       | Protein/enzyme degradation                                                                                                                                                                                                                            |
| v <sub>13</sub>               | $\frac{k_{13.1} \cdot [Protein] \cdot (1 + k_{13.2} \cdot [Hog1PP])}{Km_{13} + [Protein] \cdot (1 + k_{13.2} \cdot [Hog1PP])}$ | Glycerol production. As glycerol concentration also involves other proteins and cofactors that are potentially limiting a saturation kinetic is assumed. In addition, effective enzyme concentration can be enhanced as a function of activated Hog1. |
| v <sub>14</sub>               | $k_{tr} \cdot k_s \cdot ([Gly_{in}] - [Gly_{ex}])$                                                                             | Gradient driven glycerol flow out of the cell, where $k_{tr}$ characterises the state of the aquaglyceroporin channel Fps1 and $k_s$ the maximal transport capacity of the channel.                                                                   |
| v <sub>15_{\{1,2,3,4\}}</sub> | $k_{15} \cdot Fps1_{Activ_{\{1,2,3,4\}}} \cdot [Fps1]$                                                                         | Volume dependent closure of Fps1, in conjunction with v <sub>16.1</sub> , v <sub>16.2</sub> , v <sub>16.3</sub> and v <sub>16.4</sub> , respectively.                                                                                                 |
| v <sub>15.5</sub>             | $k_{15} \cdot Turgor_{Deactiv} \cdot [Fps1]$                                                                                   | Turgor dependent closure of Fps1, in conjunction with v <sub>16.5</sub> , v <sub>16.6</sub> , v <sub>16.7</sub> , v <sub>16.8</sub> .                                                                                                                 |
| v <sub>16.1</sub>             | $k_{16} \cdot [Fps1P]$                                                                                                         | Constitutive channel opening v <sub>16.5</sub> , in conjunction with v <sub>15.1</sub> .                                                                                                                                                              |

---

---

|             |                                                                                                            |                                                                                                  |
|-------------|------------------------------------------------------------------------------------------------------------|--------------------------------------------------------------------------------------------------|
| $v_{16\_2}$ | $\frac{k_{16} \cdot [Fps1P]}{1 + \left(\frac{[Hog1PP]}{K_{i,16}}\right)^{h_{16}}}$                         | Activated Hog1 inhibited channel opening, in conjunction with $v_{15\_2}$ .                      |
| $v_{16\_3}$ | $k_{16} \cdot Turgor_{Activ} \cdot [Fps1P]$                                                                | Turgor dependent channel opening, in conjunction with $v_{15\_3}$ .                              |
| $v_{16\_4}$ | $\frac{k_{16} \cdot Turgor_{Activ} \cdot [Fps1P]}{1 + \left(\frac{[Hog1PP]}{K_{i,16}}\right)^{h_{16}}}$    | Turgor dependent channel opening, inhibited by activated Hog1, in conjunction with $v_{15\_4}$ . |
| $v_{16\_5}$ | $k_{16\_5} \cdot [Fps1P]$                                                                                  | Constitutive channel opening, in conjunction with $v_{15\_5}$ .                                  |
| $v_{16\_6}$ | $\frac{k_{16\_6} \cdot [Fps1P]}{1 + \left(\frac{[Hog1PP]}{K_{i,16}}\right)^{h_{16}}}$                      | Activated Hog1 inhibited channel opening, in conjunction with $v_{15\_5}$ .                      |
| $v_{16\_7}$ | $k_{16\_7} \cdot Turgor_{Activ} \cdot [Fps1P]$                                                             | Turgor dependent channel opening, in conjunction with $v_{15\_5}$ .                              |
| $v_{16\_8}$ | $\frac{k_{16\_8} \cdot Turgor_{Activ} \cdot [Fps1P]}{1 + \left(\frac{[Hog1PP]}{K_{i,16}}\right)^{h_{16}}}$ | Turgor dependent channel opening inhibited by activated Hog1, in conjunction with $v_{15\_5}$ .  |
| $v_{17\_1}$ | $k_{17\_1}$                                                                                                | Fps1 production, in conjunction with $v_{18}$ .                                                  |
| $v_{17\_2}$ | $k_{17\_2}$                                                                                                | Fps1 production, in conjunction with $v_{18\_1}$ .                                               |
| $v_{18\_1}$ | $k_{18} \cdot [Hog1PP] \cdot [Fps1]$                                                                       | Hog1 dependent Fps1 degradation/internalisation, in conjunction with $v_{17\_1}$ .               |
| $v_{18\_2}$ | $k_{18} \cdot [Protein] \cdot [Fps1]$                                                                      | Protein dependent Fps1 degradation/ internalisation, in conjunction with $v_{17\_2}$ .           |

---

**Table S5:** Auxiliary parameters and variables. Concentrations are denoted by []. Bold parameters are free parameters that are estimated from data. Volumes are in fl, concentrations in  $\mu\text{M}$  and pressures in MPa.

| Variable            | Definition                                                                            | Description                                                                     |
|---------------------|---------------------------------------------------------------------------------------|---------------------------------------------------------------------------------|
| $V_b$               | $V_0 f_{min}$                                                                         | Solid or minimal volume of the cell.                                            |
| $V$                 | $V_{os} + V_b$                                                                        | Total cell volume.                                                              |
| $V_{os0}$           | $V_0(1 - f_{min})$                                                                    | Initial osmotically active volume.                                              |
| $V_{P=0}$           | $V_0 e^{\frac{P_0}{\varepsilon}}$                                                     | Non-turgid volume.                                                              |
| $A$                 | $(36\pi)^{1/3} V^{2/3}$                                                               | Total cell surface area.                                                        |
| $f_{n2\mu\text{M}}$ | $10^{21} \text{mol}^{-1} V_{os0}^{-1}$                                                | Factor converting number of molecules in $\mu\text{M}$ concentrations per cell. |
| $c_0^i$             | $c_0^e + \frac{P_0}{f_{c2p} RT}$                                                      | Initial total cellular osmolyte concentration.                                  |
| $c_0^{in}$          | $c_0^i - [Gly_{in}]$                                                                  | Initial non-permeable cellular osmolyte concentration.                          |
| $c_n^e$             | $c_0^e - [Gly_{ex}] + \left(1 - e^{\frac{t_s - t}{t_m}}\right) 2\theta c_{NaCl} 10^6$ | Osmotic salt shock. Starts at time $t_s$ and has a certain mixing time $t_m$ .  |

---

|                     |                                                                                                                                             |                                                               |
|---------------------|---------------------------------------------------------------------------------------------------------------------------------------------|---------------------------------------------------------------|
| $Osm_{in}$          | $[Gly_{in}] + \frac{c_0^{in} V_{os0}}{V_{os}}$                                                                                              | Intracellular osmotically active concentration.               |
| $Osm_{ex}$          | $c_n^e + [Gly_{ex}]$                                                                                                                        | Extracellular osmotically active concentration.               |
| $Turgor$            | $\begin{cases} \varepsilon \ln\left(\frac{V}{V_{P=0}}\right) & \text{for } V > V_{P=0} \\ 0 & \text{else} \end{cases}$                      | Turgor pressure [MPa].                                        |
| $Sln1_{Activ}$      | $\begin{cases} \frac{A_0 - A}{A_0} - Sln1_{offset} & \text{for } \frac{A_0 - A}{A_0} > Sln1_{offset} \\ 0 & \text{else} \end{cases}$        | Linear activation function for the Sln1 branch.               |
| $Sln1_{offset}$     | $\frac{k_2 \cdot [Phosphatase]_0 \cdot [Pbs2P]_0}{k_1 \cdot [Pbs2]_0}$                                                                      | Steady state activation of the Sln1 branch.                   |
| $Sln1_{Activ\_fb}$  | $\begin{cases} \frac{A_0 - A}{A_0} - Sln1_{offset\_fb} & \text{for } \frac{A_0 - A}{A_0} > Sln1_{offset} \\ 0 & \text{else} \end{cases}$    | Linear activation function for the Sln1 branch with feedback. |
| $Sln1_{offset\_fb}$ | $\frac{k_2 \cdot [Phosphatase]_0 \cdot [Pbs2P]_0 \cdot \left(1 + \left(\frac{[Hog1PP]_0}{K_{i,1}}\right)^{h_1}\right)}{k_1 \cdot [Pbs2]_0}$ | Steady state activation of the Sln1 branch with feedback.     |
| $Sho1_{Activ}$      | $\begin{cases} \frac{A_0 - A}{A_0} - Sho1_{offset} & \text{for } \frac{A_0 - A}{A_0} > Sho1_{offset} \\ 0 & \text{else} \end{cases}$        | Linear activation function for the Sln1 branch.               |
| $Sho1_{offset}$     | $\frac{k_4 \cdot [Sho1Pbs2P]_0}{k_3 \cdot [Pbs2]_0 \cdot [Sho1]_0}$                                                                         | Steady state activation of the Sln1 branch.                   |

---

|                          |                                                                                                                                                                                                               |                                                               |
|--------------------------|---------------------------------------------------------------------------------------------------------------------------------------------------------------------------------------------------------------|---------------------------------------------------------------|
| $Sho1_{Activ\_fb}$       | $\begin{cases} \frac{A_0 - A}{A_0} - Sho1_{offset\_fb} & \text{for } \frac{A_0 - A}{A_0} > Sho1_{offset} \\ 0 & \text{else} \end{cases}$                                                                      | Linear activation function for the Sln1 branch with feedback. |
| $Sho1_{offset\_fb}$      | $\frac{k_4 \cdot [Sho1Pbs2P]_0 \cdot \left(1 + \left(\frac{[Hog1PP]_0}{K_{i,3}}\right)^{h_3}\right)}{k_3 \cdot [Pbs2]_0 \cdot [Sho1]_0}$                                                                      | Steady state activation of the Sln1 branch with feedback.     |
| $k_{10}$                 | $\frac{k_9 \cdot [Hog1PP]_0}{K_{m_9} + [Hog1PP]_0} \cdot \frac{1}{[RNA]_0}$                                                                                                                                   | RNA degradation rate.                                         |
| $k_{12}$                 | $\frac{k_{11} \cdot [RNA]_0}{[Protein]_0}$                                                                                                                                                                    | Protein degradation rate.                                     |
| $k_{tr}$                 | $\frac{[Fps1]}{Fps1_t}$                                                                                                                                                                                       | Fps1 channel closure.                                         |
| $k_s$                    | $V_{os0} \frac{k_{13,1} \cdot [Protein]_0 \cdot (1 + k_{13,2} \cdot [Hog1PP]_0)}{K_{m_{13}} + [Protein]_0 \cdot (1 + k_{13,2} \cdot [Hog1PP]_0)} \cdot \frac{1}{k_{tr0} \cdot ([Gly_{in}]_0 - [Gly_{ex}]_0)}$ | Maximal Fps1 glycerol transport capacity.                     |
| $Fps1_{Activ_{\{1-4\}}}$ | $\begin{cases} \frac{A_0 - A}{A_0} - Fps1_{offset_{\{1-4\}}} & \text{for } \frac{A_0 - A}{A_0} > Fps1_{offset_{\{1-4\}}} \\ 0 & \text{else} \end{cases}$                                                      | Linear activation function for Fps1 closure.                  |
| $Fps1_{offset\_1}$       | $\frac{k_{16} \cdot [Fps1P]_0}{k_{15} \cdot [Fps1]_0}$                                                                                                                                                        | Steady state activation for Fps1 closure.                     |
| $Fps1_{offset\_2}$       | $\frac{k_{16} \cdot [Fps1P]_0}{\left(1 + \left(\frac{[Hog1PP]_0}{K_{i,16}}\right)^{h_{16}}\right) k_{15} \cdot [Fps1]_0}$                                                                                     | Steady state activation for Fps1 closure.                     |
| $Fps1_{offset\_3}$       | $\frac{k_{16} \cdot [Fps1P]_0 Turgor_{Activ0}}{k_{15} \cdot [Fps1]_0}$                                                                                                                                        | Steady state activation for Fps1 closure.                     |
| $Fps1_{offset\_4}$       | $\frac{k_{16} \cdot [Fps1P]_0 Turgor_{Activ0}}{\left(1 + \left(\frac{[Hog1PP]_0}{K_{i,16}}\right)^{h_{16}}\right) k_{15} \cdot [Fps1]_0}$                                                                     | Steady state activation for Fps1 closure.                     |

|                    |                                                                                                                        |                                   |
|--------------------|------------------------------------------------------------------------------------------------------------------------|-----------------------------------|
| $Turgor_{Deactiv}$ | $1 - \frac{Turgor^{h_{TurgorActiv}}}{P_0^{h_{TurgorActiv}} + Turgor^{h_{TurgorActiv}}}$                                | Turgor dependent<br>Fps1 closure. |
| $Turgor_{Activ}$   | $\frac{Turgor^{h_{TurgorActiv}}}{P_0^{h_{TurgorActiv}} + Turgor^{h_{TurgorActiv}}}$                                    | Turgor dependent<br>Fps1 opening. |
| $k_{16,5}$         | $\frac{k_{15} \cdot 0.5 \cdot [Fps1]_0}{[Fps1P]_0}$                                                                    |                                   |
| $k_{16,6}$         | $\frac{k_{15} \cdot 0.5 \cdot [Fps1]_0 \left(1 + \left(\frac{[Hog1PP]_0}{K_{i,16}}\right)^{h_{16}}\right)}{[Fps1P]_0}$ |                                   |
| $k_{16,7}$         | $\frac{k_{15} \cdot 0.5 \cdot [Fps1]_0 \left(1 + \left(\frac{[Hog1PP]_0}{K_{i,16}}\right)^{h_{16}}\right)}{[Fps1P]_0}$ |                                   |
| $k_{16,8}$         | $\frac{k_{15} \cdot [Fps1]_0 \left(1 + \left(\frac{[Hog1PP]_0}{K_{i,16}}\right)^{h_{16}}\right)}{[Fps1P]_0}$           |                                   |

**Table S6:** Constants used in the models.

| Parameter                                   | Value                 | Description                                                                 |
|---------------------------------------------|-----------------------|-----------------------------------------------------------------------------|
| $R$ [J/mol/K]                               | 8.314                 | Gas constant.                                                               |
| $T$ [K]                                     | 303.15                | Temperature, corresponds to 30°C.                                           |
| mol                                         | $6.022 \cdot 10^{23}$ | Mole number.                                                                |
| $\theta$                                    | 0.93                  | Osmotic coefficient for salt.                                               |
| $f_{c2p}$                                   | $10^{-9}$             | Factor converting concentrations in M to pressures in MPa.                  |
| $t_m$ [s]                                   | 10                    | Mixing time [s] of salt in the medium.                                      |
| $L_p$ [ $\mu\text{m}/\text{Mpa}/\text{s}$ ] | 0.013                 | Hydraulic conductivity (estimate from data from (Eriksson, et al., 2007)).  |
| $P_0$ [MPa]                                 | 0.61                  | Initial turgor pressure (Schaber, et al., 2010)                             |
| $\varepsilon$                               | 14.3                  | Membrane rigidity (Schaber, et al., 2010)                                   |
| $f_{\min}$                                  | 0.41                  | Minimal cell volume (as fraction of total) (Schaber, et al., 2010)          |
| $f_n$                                       | 0.8                   | Fraction of activated Hog1 molecule in the nucleus upon maximal activation. |
| $c_0^e$ [ $\mu\text{M}$ ]                   | 260000                | Initial osmolarity of the medium (Schaber, et                               |

|                            |        |                                                                                                                                 |
|----------------------------|--------|---------------------------------------------------------------------------------------------------------------------------------|
|                            |        | al., 2010)                                                                                                                      |
| $V_0$ [fl]                 | 50     | Initial total cell volume.                                                                                                      |
| $Pbs2_t$ [ $\mu\text{M}$ ] | 0.1216 | $2160f_{n2\mu\text{M}}$ : molecule numbers from <a href="http://yeastgfp.yeastgenome.org/">http://yeastgfp.yeastgenome.org/</a> |
| $Sho1_t$ [ $\mu\text{M}$ ] | 0.1313 | $2330f_{n2\mu\text{M}}$ : molecule numbers from <a href="http://yeastgfp.yeastgenome.org/">http://yeastgfp.yeastgenome.org/</a> |
| $Hog1_t$ [ $\mu\text{M}$ ] | 0.3821 | $6788f_{n2\mu\text{M}}$ : molecule numbers from <a href="http://yeastgfp.yeastgenome.org/">http://yeastgfp.yeastgenome.org/</a> |
| $Fps1_t$ [ $\mu\text{M}$ ] | 0.051  | $907f_{n2\mu\text{M}}$ : molecule numbers from <a href="http://yeastgfp.yeastgenome.org/">http://yeastgfp.yeastgenome.org/</a>  |
| $h_{TurgorActiv}$          | 2      | Hill parameter of the turgor-activate Fps1 closure.                                                                             |

**Table S7:** Estimated parameter values  $\pm$  asymptotic standard deviation for the best approximating model (Nr. 22).

| Parameter   | Value                                 | Description                                                                             |
|-------------|---------------------------------------|-----------------------------------------------------------------------------------------|
| kHog1dephos | $1.78587 \pm 1.55\text{E-}01$         | Rate constant for reaction $v_6$ and $v_8$ [ $1/\mu\text{M} / \text{s}$ ]               |
| kHog1phos1  | $42.6397 \pm 1.47\text{E+}01$         | Rate constant for reaction $v_5$ and $v_7$ (Sho1 branch) [ $1/\mu\text{M} / \text{s}$ ] |
| kHog1phos2  | $48.0004 \pm 4.30\text{E+}01$         | Rate constant for reaction $v_5$ and $v_7$ (Sln1 branch) [ $1/\mu\text{M} / \text{s}$ ] |
| (v1_fb).Ki  | $0.00940584 \pm 2.10\text{E-}03$      | Inhibition constant for reaction $v_1$ [ $\mu\text{M}$ ]                                |
| (v1_fb).h   | $0.345701 \pm 1.27\text{E-}02$        | Hill constant for reaction $v_1$ [-]                                                    |
| (v1_fb).k   | $0.075474 \pm 2.66\text{E-}02$        | Rate constant for reaction $v_1$ [ $1 / \text{s}$ ]                                     |
| (v2).k      | $0.607124 \pm 2.44\text{E-}02$        | Rate constant for reaction $v_2$ [ $1/\mu\text{M}/\text{s}$ ]                           |
| (v3_fb).Ki  | $0.297524 \pm 1.11\text{E-}02$        | Inhibition constant for reaction $v_3$ [ $\mu\text{M}$ ]                                |
| (v3_fb).h   | $2.0793 \pm 4.58\text{E-}02$          | Hill constant for reaction $v_3$ [-]                                                    |
| (v3_fb).k   | $0.00459138 \pm 4.24\text{E-}03$      | Rate constant for reaction $v_3$ [ $1/\text{s}$ ]                                       |
| (v4).k1     | $0.00226722 \pm 4.01\text{E-}05$      | Rate constant for reaction $v_4$ [ $1/\text{s}$ ]                                       |
| (v9).Km     | $0.506878 \pm 5.42\text{E-}03$        | Michaelis-Menten constant for reaction $v_9$ [ $\mu\text{M}$ ]                          |
| (v9).k      | $18.1824 \pm 4.63\text{E+}01$         | Rate constant for reaction $v_9$ [ $\mu\text{M} / \text{s}$ ]                           |
| (v11).k     | $9.07\text{E-}05 \pm 8.19\text{E-}07$ | Rate constant for reaction $v_{11}$ [ $1/\text{s}$ ]                                    |
| (v13).Km    | $0.420741 \pm 5.22\text{E-}03$        | Michaelis-Menten constant for reaction $v_{13}$ [ $\mu\text{M}$ ]                       |



|            |                           |                                                                          |
|------------|---------------------------|--------------------------------------------------------------------------|
| (v13).k1   | $680.818 \pm 5.13E+00$    | Rate constant for reaction $v_{13}$ (Gpd1 influence) [ $\mu\text{M/s}$ ] |
| (v13).k2   | $46.8363 \pm 1.78E+00$    | Rate constant for reaction $v_{13}$ (Hog1 influence) [ $1/\mu\text{M}$ ] |
| (v15_5).k  | $0.00529124 \pm 3.81E-04$ | Rate constant for reaction $v_{15_5}$ [ $1/\text{s}$ ]                   |
| (v16_6).Ki | $0.0811033 \pm 9.86E-03$  | Inhibition constant for reaction $v_{16_6}$ [ $\mu\text{M}$ ]            |
| (v16_6).h  | $0.628719 \pm 3.02E-02$   | Hill constant for reaction $v_{16_6}$ [-]                                |

**Table S8:** First ten candidate models according to AICc using both fitted and predicted SSR including models with oscillations.

| Rank | Model Nr. | Candidate Models Mechanisms |              |                  |               |                   | Oscillations | $n$ | $k$ | SSR   | AICc   | Akaike weight | cutoff |
|------|-----------|-----------------------------|--------------|------------------|---------------|-------------------|--------------|-----|-----|-------|--------|---------------|--------|
|      |           | Fps1 opening                | Fps1 closure | Fps1 degradation | Fps1 feedback | Branch production |              |     |     |       |        |               |        |
| 1    | 22        | H                           | T            | -                | B             | H+G               | -            | 515 | 20  | 547.4 | 1532.9 | 0.56          | OK     |
| 2    | 30        | H                           | T            | H                | B             | H+G               | -            | 515 | 21  | 546.2 | 1533.8 | 0.36          | OK     |
| 3    | 170       | H                           | A            | P                | B             | G                 | ++           | 515 | 21  | 550.4 | 1537.7 | 0.05          | OK     |
| 4    | 78        | H                           | T            | P                | B             | H+G               | -            | 515 | 21  | 551.9 | 1539.2 | 0.02          | -      |
| 5    | 126       | H                           | T            | H                | B             | G                 | ++           | 515 | 20  | 555.7 | 1540.7 | 0.01          | -      |
| 6    | 174       | H                           | T            | P                | B             | G                 | ++           | 515 | 20  | 562.8 | 1547.2 | 0.00          | -      |
| 7    | 17        | -                           | A            | -                | B             | H+G               | -            | 515 | 19  | 584.0 | 1564.3 | 0.00          | -      |
| 8    | 32        | H <sub>T</sub> <sup>+</sup> | T            | H                | B             | H+G               | ++           | 515 | 21  | 581.7 | 1566.2 | 0.00          | -      |
| 9    | 128       | H <sub>T</sub> <sup>+</sup> | T            | H                | B             | G                 | ++           | 515 | 20  | 586.9 | 1568.8 | 0.00          | -      |
| 10   | 24        | H <sub>T</sub> <sup>+</sup> | T            | -                | B             | H+G               | -            | 515 | 20  | 588.3 | 1570.0 | 0.00          | -      |

*AICc*: corrected Akaike information criterion, *SSR*: sum of squared residuals,  $n$  number of data points,  $k$  number of fitted parameters. Candidate Model Mechanisms: H - Hog1 dependent, T - Turgor dependent, A - Area dependent, P – Protein dependent, G – Gpd1 dependent, B – feedback on both branches. -: None, ++ oscillations or damped oscillation with more than 5 clearly visible peaks.

**Table S9:** First ten candidate models according to AICc using only fitted SSR excluding models with oscillations.

| Rank | Model Nr. | Candidate Model Mechanisms |              |                  |                 |      | Glycerol production | N  | K     | SSR    | AICc | Akaike weight | cutoff |
|------|-----------|----------------------------|--------------|------------------|-----------------|------|---------------------|----|-------|--------|------|---------------|--------|
|      |           | Fps1 opening               | Fps1 closure | Fps1 degradation | Branch feedback | Fps1 |                     |    |       |        |      |               |        |
| 1    | 22        | H                          | T            | -                | B               | H+G  | 390                 | 20 | 426.9 | 1184.3 | 0.51 | OK            |        |
| 2    | 78        | H                          | T            | P                | B               | H+G  | 390                 | 21 | 425.0 | 1184.8 | 0.39 | OK            |        |
| 3    | 30        | H                          | T            | H                | B               | H+G  | 390                 | 21 | 428.2 | 1187.7 | 0.09 | OK            |        |
| 4    | 17        | -                          | A            | -                | B               | H+G  | 390                 | 19 | 455.3 | 1207.2 | 0.00 | -             |        |
| 5    | 24        | H+T                        | T            | -                | B               | H+G  | 390                 | 20 | 457.1 | 1210.9 | 0.00 | -             |        |
| 6    | 23        | T                          | T            | -                | B               | H+G  | 390                 | 18 | 463.7 | 1212.1 | 0.00 | -             |        |
| 7    | 18        | H                          | A            | -                | B               | H+G  | 390                 | 21 | 460.0 | 1215.7 | 0.00 | -             |        |
| 8    | 20        | H+T                        | A            | -                | B               | H+G  | 390                 | 21 | 460.2 | 1215.9 | 0.00 | -             |        |
| 9    | 75        | T                          | A            | P                | B               | H+G  | 390                 | 20 | 467.7 | 1219.9 | 0.00 | -             |        |
| 10   | 19        | T                          | A            | -                | B               | H+G  | 390                 | 19 | 426.9 | 1184.3 | 0.00 | -             |        |

*AICc*: corrected Akaike information criterion, *SSR*: sum of squared residuals, *n* number of data points, *k* number of fitted parameters. Candidate Model Mechanisms: H - Hog1 dependent, T - Turgor dependent, A - Area dependent, P – Protein dependent, G – Gpd1 dependent, B – feedback on both branches.

**Table S10:** First ten candidate models according to AICc using both fitted and predicted SSR excluding models with oscillations.

| Rank | Model Nr. | Candidate Model Mechanisms |              |                  |                 |      | Glycerol production | N  | K     | SSR    | AICc | Akaike weight | cutoff |
|------|-----------|----------------------------|--------------|------------------|-----------------|------|---------------------|----|-------|--------|------|---------------|--------|
|      |           | Fps1 opening               | Fps1 closure | Fps1 degradation | Branch feedback | Fps1 |                     |    |       |        |      |               |        |
| 1    | 22        | H                          | T            | -                | B               | H+G  | 515                 | 20 | 547.4 | 1534.6 | 0.61 | OK            |        |
| 2    | 30        | H                          | T            | H                | B               | H+G  | 515                 | 21 | 546.2 | 1535.6 | 0.36 | OK            |        |
| 3    | 78        | H                          | T            | P                | B               | H+G  | 515                 | 21 | 551.9 | 1541.0 | 0.02 | -             |        |
| 4    | 17        | -                          | A            | -                | B               | H+G  | 515                 | 19 | 584.0 | 1565.8 | 0.00 | -             |        |
| 5    | 24        | H+T                        | T            | -                | B               | H+G  | 515                 | 20 | 588.3 | 1571.7 | 0.00 | -             |        |
| 6    | 23        | T                          | T            | -                | B               | H+G  | 515                 | 18 | 595.7 | 1573.9 | 0.00 | -             |        |
| 7    | 86        | H                          | T            | P                | S               | H+G  | 515                 | 19 | 599.6 | 1579.4 | 0.00 | -             |        |
| 8    | 18        | H                          | A            | -                | B               | H+G  | 515                 | 21 | 596.3 | 1580.9 | 0.00 | -             |        |
| 9    | 20        | H+T                        | A            | -                | B               | H+G  | 515                 | 21 | 596.9 | 1581.4 | 0.00 | -             |        |
| 10   | 81        | -                          | A            | P                | S               | H+G  | 515                 | 18 | 547.4 | 1534.6 | 0.00 | -             |        |

*AICc*: corrected Akaike information criterion, *SSR*: sum of squared residuals, *n* number of data points, *k* number of fitted parameters. Candidate Model Mechanisms: H - Hog1 dependent, T - Turgor dependent, A - Area dependent, P – Protein dependent, G – Gpd1 dependent, B – feedback on both branches, S – feedback on Sln1-branch only.

## 2 Saturation and inhibition kinetics

In table S4 the kinetics of all rate reactions used in the model are listed. For most reactions we assumed simple mass actions. This was mainly due to the lack of more detailed information about the involved kinetics and due to our guiding principle of parsimony. However, in several cases saturation and inhibition kinetics were used, whose rationale are described here in more detail.

In the course of the model development we realised that assuming simple mass action kinetics in reactions  $v_9$  and  $v_{13}$  could not explain the data well. However, using a simple saturation kinetic gave good results implying that saturation seems to be an important feature of these reactions (see also Table S11). Therefore, in reactions  $v_9$  and  $v_{13}$  we use a saturation kinetic in the form  $v=k*M/(K_m+M)$ , where  $v$  is the reaction velocity [ $\mu\text{M/s}$ ],  $k$  [ $\mu\text{M/s}$ ] is the rate constant equivalent to the maximal reaction velocity,  $K_m$  [ $\mu\text{M}$ ] is a constant equal to the half saturation concentration of  $M$  [ $\mu\text{M}$ ], and  $M$  is a modifier. Note that the kinetic rate law has the form the Michaelis-Menten rate law, but it is not a Michaelis-Menten reaction, because  $M$  is not a substrate but a modifier and, hence, is not consumed by this reaction. Such a formulation is inspired by the assumption that transcription and glycerol production cannot be up-regulated arbitrarily as a function of the modifier, because there will be limiting factors or processes, which are not explicitly considered here. In the case of  $v_9$  this might be promotor accessibility, and in the case of  $v_{13}$  this might be other metabolic steps preceding glycerol synthesis or co-factors, like NADH.

Mechanistically, such a formulation can easily be derived by assuming the following simplistic reactions and corresponding ordinary differential equations, for details see (Alon, 2007):

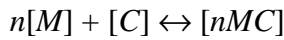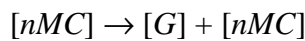

with

$$\frac{d[nMC]}{dt} = k_{on}[M]^n[C] - k_{off}[nMC]$$

$$\frac{d[G]}{dt} = \frac{k}{c_t}[nMC]$$

where  $C$  is a component that may become limiting,  $n$  is an integer indicating the amount of molecules of  $M$  that can bind  $C$ , assuming that either  $n$  or none molecules of  $M$  are bound to  $C$  and  $C_T=[C]+[nMC]$ . Further assuming that the first reaction is in equilibrium compared to the second reaction, it can be derived that

$$\frac{d[G]}{dt} = \frac{k[M]^n}{K_m^n + [M]^n} ,$$

$$\text{with } K_m = \sqrt[n]{\frac{k_{on}}{k_{off}}} .$$

In the cases of reaction  $v_9$  and  $v_{13}$  we can argue that  $[Hog1PP]$  or  $[Protein]$ , respectively, can be assumed to bind to some other components, which in turn acts as a modifier to the respective reaction. In case of  $v_9$  this would be, e.g., the promotor of the gene, and in case of  $v_{13}$  this would be, e.g., the co-factor NADH. Moreover, we set  $n=1$  for simplicity.

For reaction  $v_{13}$  we additionally included  $[Hog1PP]$  as a potential modifier. The mechanisms how  $[Hog1PP]$  increases the glycerol synthesis rate is still unclear, even though there are some indications (see main text and (Dihazi, et al., 2004)). For this reason we introduced a simple heuristic approach assuming that the effective modifier concentration can be increased by  $[Hog1PP]$ , such that  $[M] = [Protein] \cdot (1 + k_{13,2} \cdot [Hog1PP])$ . There are many possibilities to include  $[Hog1PP]$  as an additional modifier. Because this reaction and especially the role of  $[Hog1PP]$  turned out to be important, we tested several possibilities of including  $[Hog1PP]$  with only one additional parameter and a saturation kinetic. The kinetic used in the final models turned out to be best supported by data. In the next section, we provide some details about this comparison (Tables S11, S12).

For the inhibition kinetics a similar mechanism as above can be assumed (Alon, 2007). All inhibition kinetics are composed by a mass action term for the actual reaction to be inhibited, which is multiplied by the term  $\frac{1}{1+(M/K_i)^n}$ . Such a term can be

derived assuming the following reactions and corresponding ordinary differential equations, for details see (Alon, 2007):

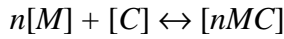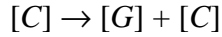

with

$$\frac{d[nMC]}{dt} = k_{on}[M]^n[C] - k_{off}[nMC]$$

$$\frac{d[G]}{dt} = \frac{k}{C_t}[C]$$

where  $C$  is a component that may become limiting,  $n$  is an integer indicating the amount of molecules of  $M$  that can bind  $C$ , assuming that either  $n$  or none molecules of  $M$  are bound to  $C$  and  $C_t = [C] + [nMC]$ . Further assuming that the first reaction is in equilibrium compared to the second reaction, it can be derived that

$$\frac{d[G]}{dt} = \frac{k}{1 + \left(\frac{[M]}{K_i}\right)^n},$$

$$\text{with } K_i = \sqrt[n]{\frac{k_{on}}{k_{off}}}.$$

### 3 Frequency Response

To study the frequency response of the best approximating model Nr. 22, we stimulated the model with a series of consecutive shocks of 0.2 M NaCl with periods of  $P_0 = 2$  minutes to  $P_0 = 64$  minutes until the amplitude of the response remained constant (Figure S1). One stimulation period is equally divided into two parts, i.e. with and without shock as in Mettetal et al. (2008).

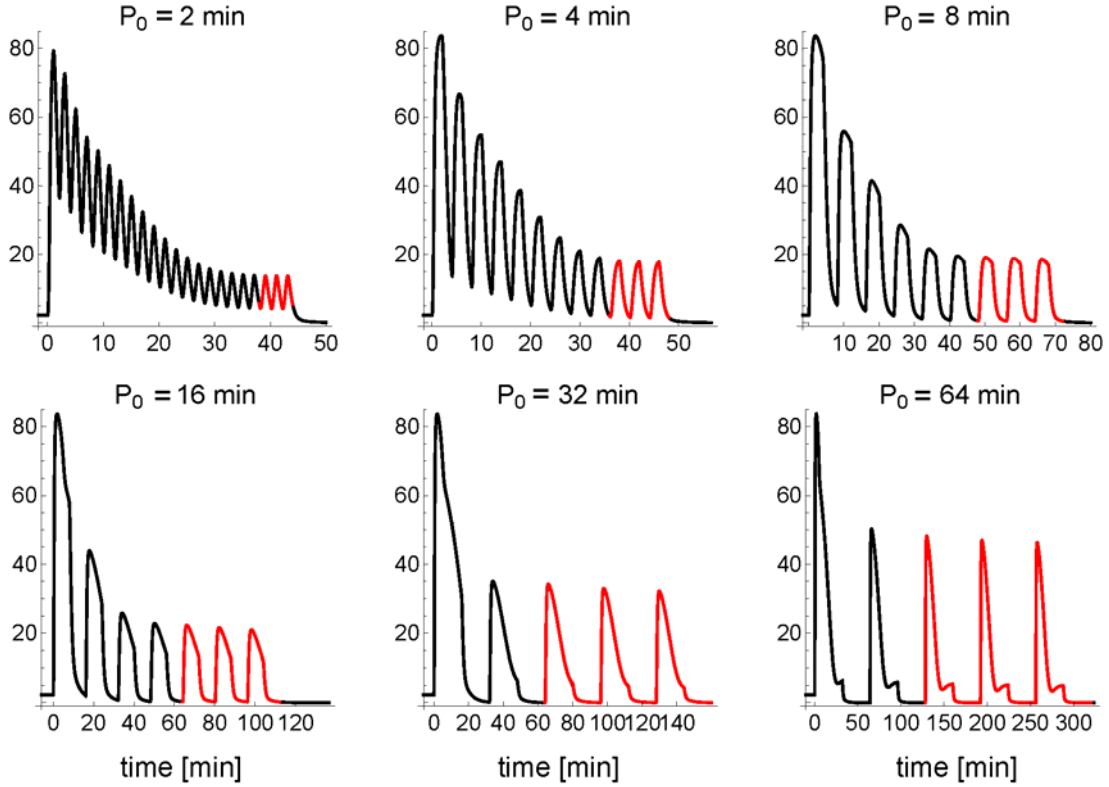

**Figure S1:** Simulated Hog1 phosphorylation for consecutive shocks of 0.2M of the indicated periods  $P_0$ . The parts of the simulations marked in red were taken for the calculation of the response amplitude  $A(\omega)$ .

When a steady-state response was reached, i.e. when the amplitude of the response  $A(\omega)$  as a function of the stimulation frequency  $\omega = 2\pi/P_0$  remained constant, the response of the last three complete periods (red lines in Figure S1 and S2) was taken to calculate  $A(\omega)$  from the corresponding Fourier coefficient  $F(\omega)$ .

$$F(\omega) = 2 \int_{nP_0}^{(n+m)P_0} \frac{e^{-i\omega t} S(t)}{mP_0} dt$$

where  $n$  is the starting period for the calculation after start of the experiment,  $m$  is the number of periods taken for the calculation (marked in red in Figures S1 and S2) and  $S(t)$  is the respective simulation (Figure S1) or interpolated data (Figure S2). The amplitude of the response is then defined as  $A(\omega) = |F(\omega)|$  (Mettetal, et al., 2008).

We re-calculated the response amplitude of Hog1 nuclear localisation from data published in the Supplementary Material from Mettetal et al (2008), which we digitized from Figure S2 therein (Figure S2).

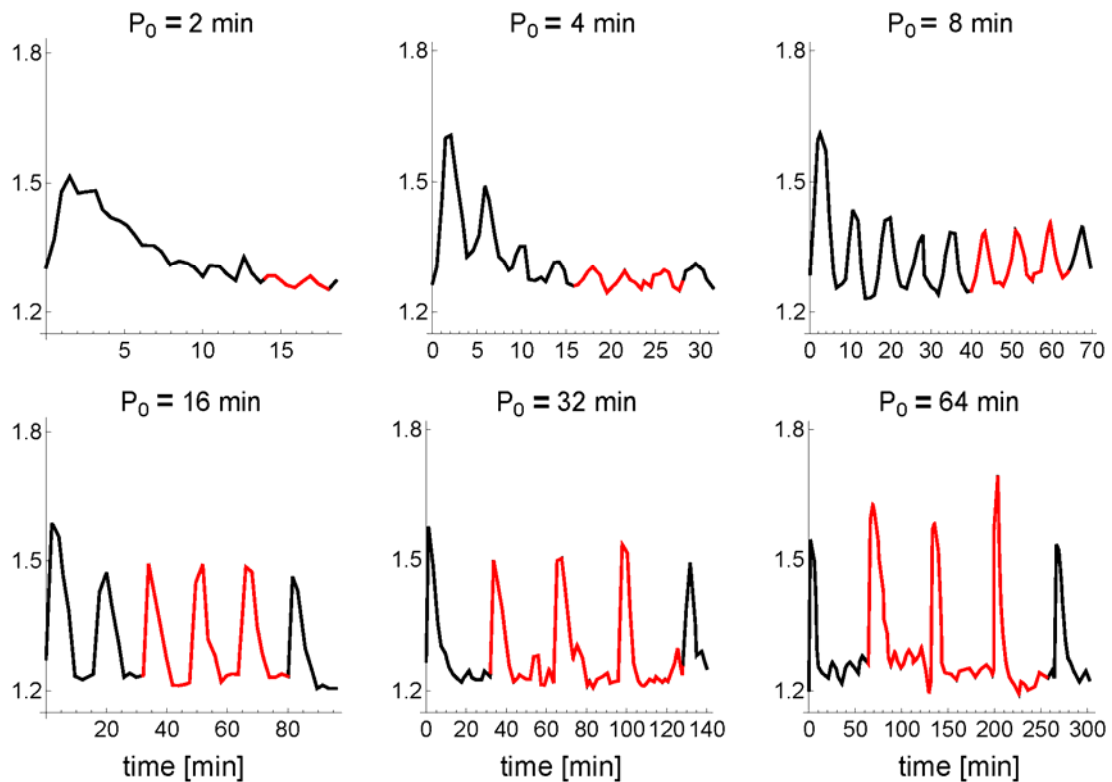

**Figure S2:** Measured Hog1 nuclear localisation after consecutive shocks of 0.2M of the indicated periods  $P_0$  (data digitised from Figure S2 in Mettetal et al. (2009)). The parts of the simulations marked in red were taken for the calculation of the response amplitude  $A(\omega)$ .

In Figure S3 the resulting Bode plots for the simulation and the re-analysed data from Mettetal et al. (2008) are shown. For both the simulations and the data, we observe an increasing response amplitude  $A(\omega)$  with decreasing frequency  $\omega$ . Such behaviour has also been observed in another study and described as a low-pass filter characteristic (Hersen, et al., 2008). We assume that simulation and measurements are comparable, because Hog1 nuclear localisation and Hog1 phosphorylation are highly correlated.

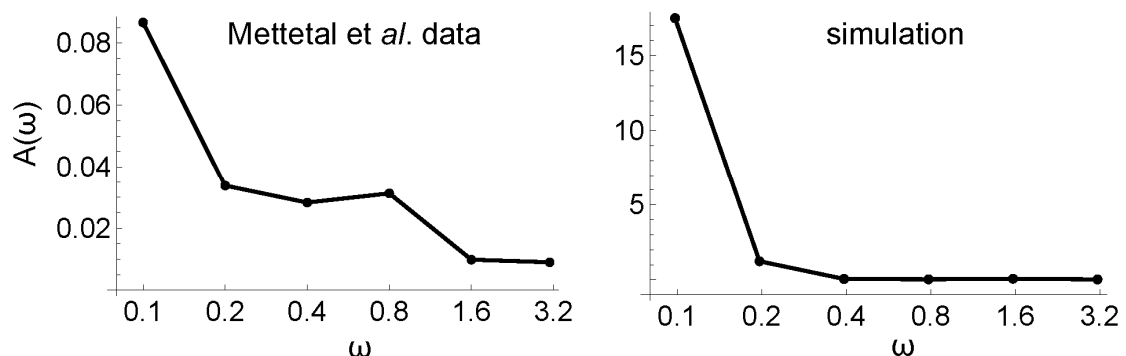

**Figure S3:** Response amplitude  $A(\omega)$  vs. frequency  $\omega$  for the simulation (Figure S1) and the re-analysed data from Mettetal et al. (2009) (Figure S2). Note the for the data (left panel)  $A(\omega)$  of Hog1 nuclear localisation is shown, whereas for the simulation (right panel)  $A(\omega)$  of Hog1 phosphorylation is shown.

## 4 Model sensitivities

### Kinetic rate laws for reaction $v_{13}$

It turned out that for the best approximating model reaction  $v_{13}$  had important implications, especially about the role of Hog1 in osmo-adaptation. The mechanism of how Hog1 modifies glycerol synthesis is still elusive, even though there are some indications (see main text, (Dihazi, et al., 2004)) and it is probably indirect. Therefore, we tested several possible kinetic rate laws for reaction  $v_{13}$  using the three best approximating models Nr. 22, Nr. 78 and Nr. 30 (Tables S9, S10) under the constraint that a saturation kinetic and only one additional parameter should be involved. Tested possible heuristic approaches are listed in Table S11.

**Table S11:** Kinetic rates law tested for reaction  $v_{13}$

| Name | Rate law                                                                                                  | Description                                                 |
|------|-----------------------------------------------------------------------------------------------------------|-------------------------------------------------------------|
| K1   | $\frac{k_{13,1}[Protein](1 + k_{13,2} \cdot [Hog1PP])}{Km_{13} + [Protein](1 + k_{13,2} \cdot [Hog1PP])}$ | Modifier is enhanced by $[Hog1PP]$ in a bilinear fashion    |
| K2   | $\frac{k_{13,1}([Protein] + k_{13,2}[Hog1PP])}{Km_{13} + [Protein] + k_{13,2}[Hog1PP]}$                   | Modifier is enhanced by $[Hog1PP]$ in a linear fashion      |
| K3   | $\frac{(k_{13,1} + k_{13,2}[Hog1PP])[Protein]}{Km_{13} + [Protein]}$                                      | Maximal reaction velocity is modified by $[Hog1PP]$         |
| K4   | $\frac{k_{13,1}[Protein]}{Km_{13} + [Protein]} + k_{13,2}[Protein][Hog1PP]$                               | $[Hog1PP]$ modifies reaction velocity by mass action        |
| K5   | $k_{13,1}[Protein] + \frac{k_{13,2}[Protein][Hog1PP]}{Km_{13} + [Hog1PP]}$                                | $[Hog1PP]$ modifies reaction velocity by saturation kinetic |
| K6   | $k_{13,1}[Protein] + k_{13,2}[Protein][Hog1PP]$                                                           | Mass action only                                            |

Each of the three best approximating models were implemented with the different possible kinetics and refitted as the original models and ranked. The results of the model discrimination disregarding oscillating models are listed in Table S12.

**Table S12:** Model discrimination analysis for different kinetic rate laws for reaction  $v_{13}$  using the three best approximating models Nr. 22, 78 and 30.

| Rank | Model | Candidate Mechanisms for Reaction $v_{13}$ in Models Nr. 22, Nr. 78 and Nr. 30 (Table S11) | N   | K  | SSR   | AICc   | Akaike weight | cutoff |
|------|-------|--------------------------------------------------------------------------------------------|-----|----|-------|--------|---------------|--------|
| 1    | 22    | K1                                                                                         | 390 | 20 | 426.9 | 1184.3 | 1.00          | OK     |
| 2    | 78    | K1                                                                                         | 390 | 21 | 425.0 | 1184.8 | 0.77          | OK     |
| 3    | 30    | K1                                                                                         | 390 | 21 | 428.2 | 1187.7 | 0.18          | OK     |
| 4    | 78    | K2                                                                                         | 390 | 21 | 432.3 | 1191.4 | 0.03          | NO     |
| 5    | 22    | K2                                                                                         | 390 | 20 | 442.8 | 1198.6 | 0.00          | NO     |

|    |    |    |     |    |        |        |      |    |
|----|----|----|-----|----|--------|--------|------|----|
| 6  | 22 | K6 | 390 | 19 | 535.9  | 1270.8 | 0.00 | NO |
| 7  | 30 | K6 | 390 | 20 | 691.2  | 1372.2 | 0.00 | NO |
| 8  | 78 | K6 | 390 | 20 | 693.0  | 1373.2 | 0.00 | NO |
| 9  | 78 | K5 | 390 | 21 | 1007.3 | 1521.4 | 0.00 | NO |
| 10 | 22 | K4 | 390 | 20 | 1518.5 | 1679.2 | 0.00 | NO |

*AICc*: corrected Akaike information criterion, *SSR*: sum of squared residuals, *n* number of data points, *k* number of fitted parameters.

The kinetic rate law used in the final version of the model (K1) is best supported by the data.

### Parameter sensitivities

We calculated relative sensitivities *S* as

$$S = \frac{\frac{\Delta O}{O}}{\frac{\Delta p}{p}},$$

where  $\Delta O/O$  is the relative change of the 95% volume adaptation time upon 0.4 M NaCl osmotic shock, i.e. the time the cell needs to recover 95% of its initial volume, and  $\Delta p/p$  is the relative change in parameter or initial condition, compared to the initial state, respectively.

In Table S11 we list the maximum of the absolute value of *S*, where we multiplied and divided the initial conditions by 2 and the parameters by 5, respectively.

**Table S13:** Maximum of absolute sensitivities of the 95% volume adaptation times upon 0.4 M NaCl osmotic shock .

| Initial Condition               | <i>S</i> | Parameter   | <i>S</i> |
|---------------------------------|----------|-------------|----------|
| <i>Sho1</i> <sub>0</sub>        | 0.02     | kHog1dephos | 0.18     |
| <i>Pbs2</i> <sub>t</sub>        | 0.15     | kHog1phos1  | 0.19     |
| <i>Hog1</i> <sub>t</sub>        | 0.16     | kHog1phos2  | 0.04     |
| <i>Hog1PP</i> <sub>0</sub>      | 0.16     | (v1_fb).Ki  | 0.05     |
| <i>Phosphatase</i> <sub>0</sub> | 0.1      | (v1_fb).h   | 0.07     |
| <i>RNA</i> <sub>0</sub>         | 0.11     | (v1_fb).k   | 0.18     |
| <i>Protein</i> <sub>0</sub>     | 0.07     | (v2).k      | 0.10     |
| <i>Glyin</i> <sub>0</sub>       | 0.22     | (v3_fb).Ki  | 0.05     |
| <i>Fps1</i> <sub>t</sub>        | 0.00     | (v3_fb).h   | 0.02     |
| <i>P</i> <sub>0</sub>           | 2.38     | (v3_fb).k   | 0.04     |
| $\varepsilon$                   | 0.28     | (v4).k1     | 0.04     |



|       |      |            |      |
|-------|------|------------|------|
| $V_0$ | 0.00 | (v9).Km    | 0.18 |
|       |      | (v9).k     | 0.00 |
|       |      | (v11).k    | 0.26 |
|       |      | (v13).Km   | 0.93 |
|       |      | (v13).k1   | 2.38 |
|       |      | (v13).k2   | 0.79 |
|       |      | (v15_5).k  | 0.28 |
|       |      | (v16_6).Ki | 0.11 |
|       |      | (v16_6).h  | 0.36 |

---

## 5 Likelihood profiles

In order to address identifiability of the parameters we calculated likelihood profiles for each fitted parameter, respectively (Raue, et al., 2009; Schaber 2012; Schaber and Klipp, 2011). The likelihood profile  $LP(p_i)$  for each parameter  $\hat{p}_i$  ( $i=1, \dots, m$ ) is defined as

$$LP(p_i) = \min_{p_{j \neq i}}(SSR(p))$$

i.e. re-optimizing the objective function value  $SSR(p)$  with respect to all parameters  $p_{j \neq i}$  for defined values of  $p_i$  in a neighbourhood of the original estimated parameter value  $\hat{p}_i$  (Table S7). For simplicity, we varied the  $p_i$  in 20 logarithmic steps in the range  $\frac{\hat{p}_i}{10} \leq p_i \leq 10\hat{p}_i$ , respectively. Only the range for parameter (v3\_fb).k3 and (v16\_6).h16 we had to extend more in order to reach the confidence limit. For each step  $SSR(p)$  was re-optimised varying all parameters  $p_{j \neq i}$  with a Hookes and Jeeves algorithm with 10 iteration steps.

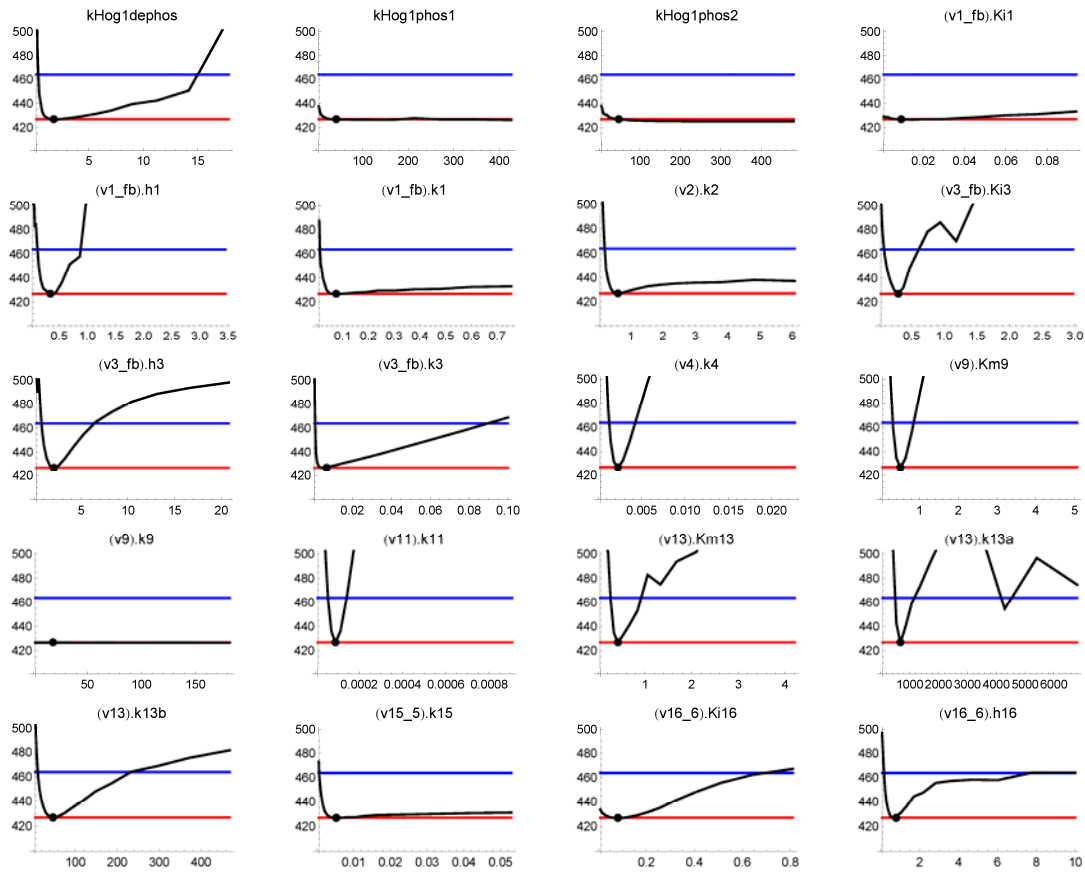

**Figure S4:** Likelihood profiles for the fitted parameters of Model 22 (Table S7). Black line: Re-fitted *SSR* for the parameter indicated in the plot label. Black point: original parameter value with the original *SSR*. Red line: original *SSR* of Model 22. Blue line: 95% confidence level, according to the approximate ellipsoidal  $100(1 - \alpha)\%$  confidence region for  $\hat{p}$ :

$$P_{CR} = \left\{ p : SSR(p) \leq SSR(\hat{p}) \left( 1 + \frac{m}{n-m} F_{m,n-m}^{\alpha} \right) \right\}. F_{m,n-m}^{\alpha} \text{ is the upper } \alpha\text{-critical value for the } F_{m,n-m}$$

-distribution, where  $m$  is the number of parameters and  $n$  the number of data points (Seber and Wild, 2003).

## 6 Adaptation times

**Table S14:** Mean adaptation times [min]  $\pm$  standard deviation for 500 Monte-Carlo simulations.

| Condition (adaptation time) | wt             | Sln1 branch    | Sho1 branch    |
|-----------------------------|----------------|----------------|----------------|
| 0.05 M NaCl (99%)           | $8.0 \pm 2.5$  | $9.8 \pm 4.0$  | $23.8 \pm 6.9$ |
| 0.1 M NaCl (99%)            | $9.3 \pm 2.3$  | $11.1 \pm 3.7$ | $22.3 \pm 6.5$ |
| 0.2 M NaCl (95%)            | $9.6 \pm 2.0$  | $10.7 \pm 2.8$ | $14.4 \pm 4.1$ |
| 0.4 M NaCl (95%)            | $26.6 \pm 3.8$ | $28.1 \pm 4.4$ | $29.5 \pm 4.1$ |

## 7 The simplified HOG model

### 7.1 Ordinary differential equation system

$$\frac{d[Hog1PP]}{dt} = k \max(E_0 + [NaCl] - [Glycerol] + T_0, 0) \frac{(H_t - [Hog1PP])}{1 + \left(\frac{[Hog1PP]}{K_i}\right)^n} - k_2[Hog1PP]$$

$$\frac{d[RNA]}{dt} = k[Hog1PP] - k_4[RNA]$$

$$\frac{d[Protein]}{dt} = k[RNA] - k_6[Protein]$$

$$\frac{d[Glycerol]}{dt} = k[Protein][Hog1PP] - k_8[Glycerol]$$

The components marked in red indicate the optional feedbacks.

### 7.2 Initial conditions and derived quantities

The simplified HOG model should also start from a non-zero steady-state, as the full model. Therefore, we set to initial values of the model to arbitrary values of with  $T_0=0.02$ ,  $[Hog1]_0=0.05$ ,  $[RNA]_0=0.01$ ,  $[P]_0=0.03$ ,  $E_0=[Glycerol]_0=0.3$ ,  $H_t=1$ ,  $k=0.1$ ,  $[NaCl]=0.$ ,  $K_i=0.1, n=2$ .

Using the steady state assumption and the parameter  $k$ , we can thus set the degradation rates:

$$k_2 = \frac{k(E_0 - [Glycerol]_0 + T_0) \frac{(H_t - [Hog1PP]_0)}{1 + \left(\frac{[Hog1PP]_0}{K_i}\right)^n}}{[Hog1PP]_0}$$

$$k_4 = \frac{k[Hog1PP]_0}{[RNA]_0}$$

$$k_6 = \frac{k[RNA]_0}{[Protein]_0}$$

$$k_8 = \frac{k[Protein]_0[Hog1PP]_0}{[Glycerol]_0}$$

### 7.3 Bifurcation Diagrams

A computational analysis of the eigenvalues of the Jacobian matrix of the simplified HOG model showed that when the real part of the maximum eigenvalue changes from negative to positive, i.e. from white squares to grey squares in Figure 9, there is a single pair of complex conjugated eigenvalues crossing the imaginary axis and the

remaining two eigenvalues remain negative. This is the hallmark of a Hopf-bifurcation giving rise to, in our case, stable oscillations. We illustrate this by plotting bifurcation diagrams of *Hog1PP* equilibria as a function of  $T_0$  for selected values of *NaCl* (Figure S5).

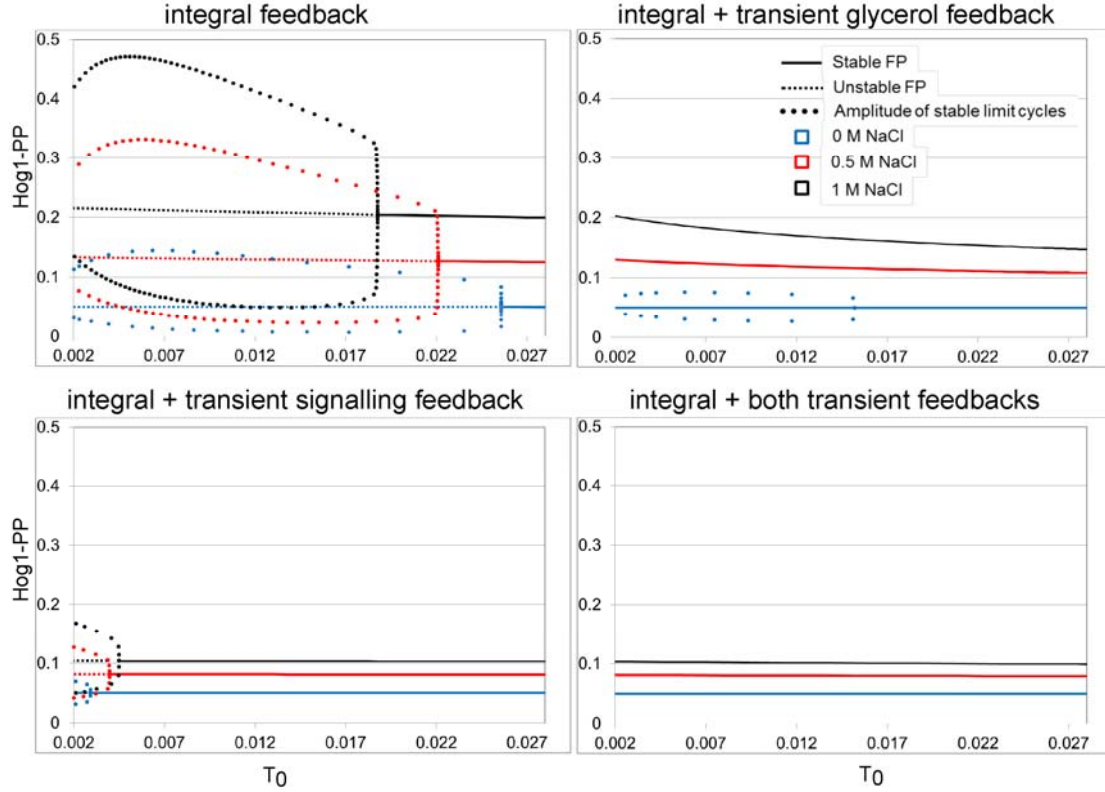

**Figure S5:** Bifurcation diagrams of the simplified HOG model including different feedbacks. The abscissa shows  $T_0$  and the ordinate shows equilibria of *Hog1PP*. Solid lines indicate stable equilibria, dotted lines indicate unstable equilibria, solid circles indicate the amplitude of stable oscillations. The colours indicate different *NaCl* conditions: Blue: 0 M *NaCl*, red: 0.5M *NaCl*, black: 1 M *NaCl*. See also Figure 9 in the main text.

Strictly speaking, the oscillations are a consequence of a Hopf-bifurcation only near the bifurcation point as long as the signal  $E_0 + [NaCl] - [Glycerol] + T_0 > 0$  for the whole trajectory. Due to the maximum function in the signal formulation, a different situation arises as soon as  $E_0 + [NaCl] - [Glycerol] + T_0 \leq 0$ . In this situation, the model changes and oscillations are a consequence of a different mechanism, but they persist as can be seen in the bifurcation diagram. In order to obtain oscillations as a consequence of a Hopf-bifurcation over the whole parameter range it suffices to have a smoothly differentiable function  $f(E_0 + [NaCl] - [Glycerol] + T_0) > 0$  as input signal.

## 8 The model correctly predicts effect of wild type and single branch inhibition

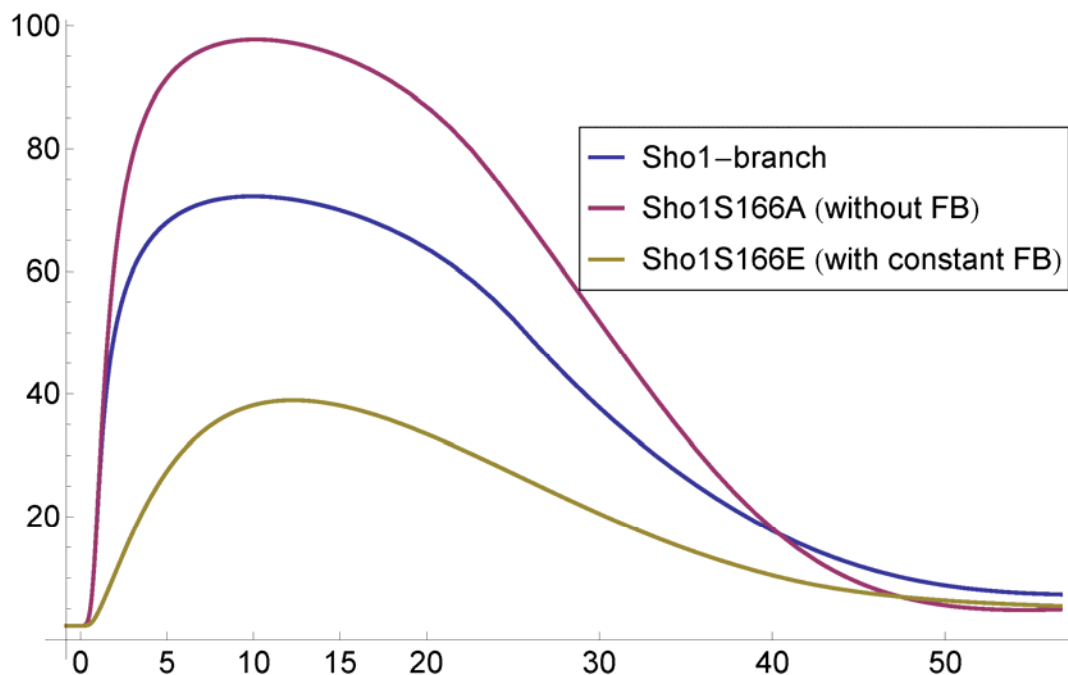

**Figure S6:** Simulated Sho1 branch mutants mimicking experiments done in Hao et al. (2007), Compare to Figure 5B therein. FB denotes feedback.

## 9 Direct non-transcriptional modification of glycerol production by Hog1 is the main mechanism responsible for Hog1 phosphorylation upon inhibition of Hog1 activity

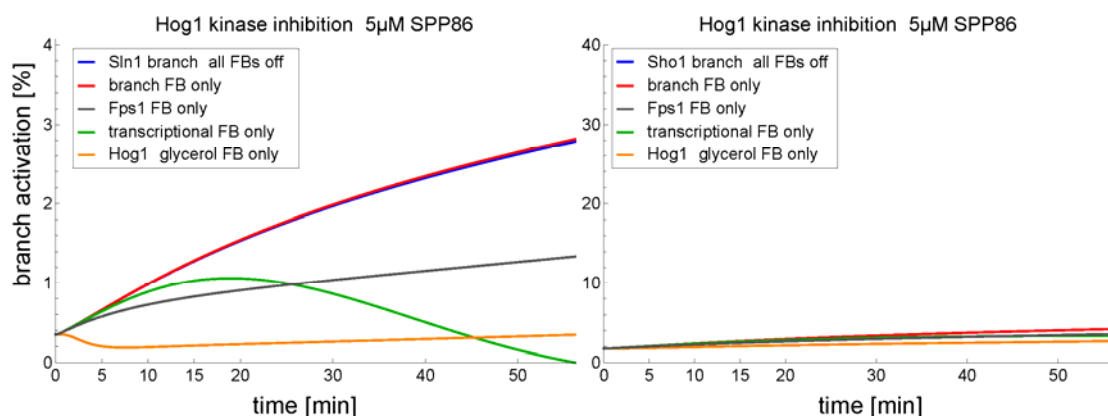

**Figure S7:** Simulated branch activations where only one of several feedback mechanisms (FB) is active at a time for the Sln1 branch and the Sho1 branch, respectively.

## 10 The two branches compete for Pbs2, but are partly additive

The best approximating model (Nr. 22), as most of the other fitted top 10 models, is able to predict the wild type Hog1 activation data (Figure 3A) even though only the single branch data was used to parameterise the model. This is an interesting result as the single branch mutants do not have to compete for Pbs2, whereas the wild type does. The possible outcome could have been everything in the range from total competition, i.e. each single branch using all of the available Pbs2, to completely additive, i.e. each branch is activating a small portion of available Pbs2, which is additive in the wild type. The prediction is a mixture of both. Both single branches only activate a small portions of the available Pbs2 (Supplementary Figure S8 and S9), however, these portion are only to a small part additive. The additive effect of Pbs2 activation translates to Hog1 activation for low stress. For low stress, i.e. lower than 0.1 M NaCl, Hog1 activation of the wild type is more pronounced than for both branches alone (Supplementary Figure S8). For larger osmotic shocks, i.e. larger than 0.4M NaCl, this effect vanishes for Hog1 maximal amplitude due to saturation effects (Supplementary Figure S9).

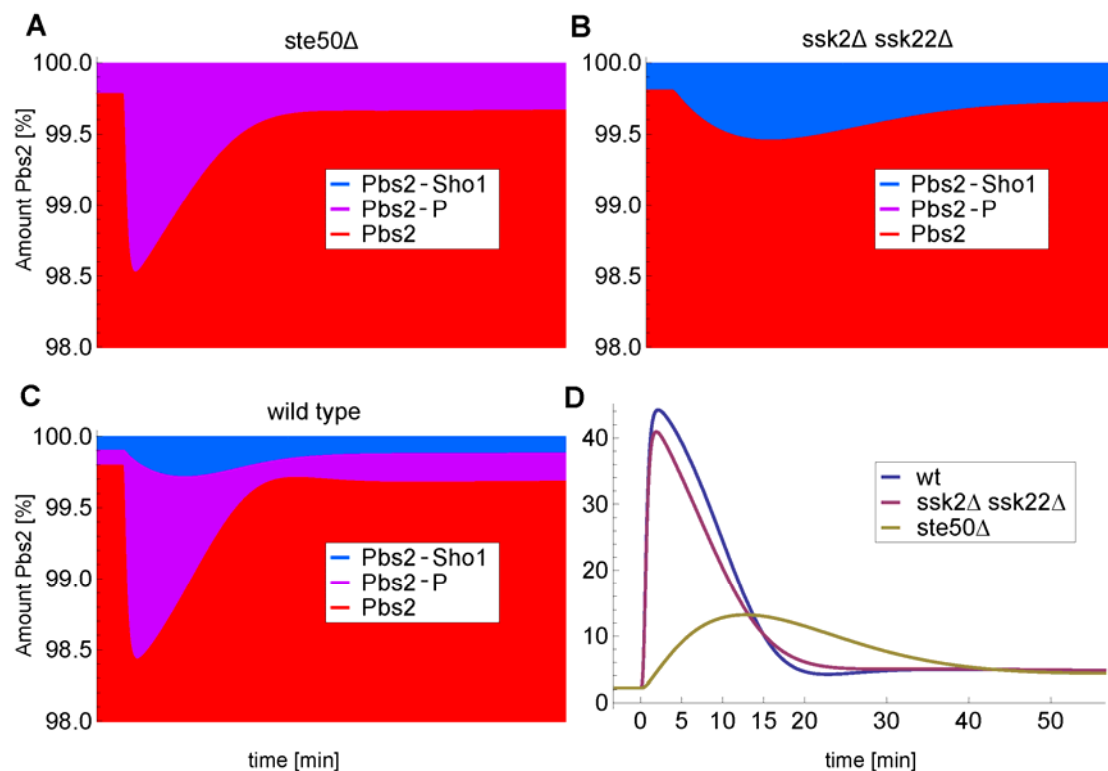

**Figure S8:** Pbs2 distribution and Hog1 activation for both branches and the wild type for 0.1 M NaCl. **A:** Pbs2 distribution *Sln1*-branch (*ste50Δ*) simulation. **B:** Pbs2 distribution *Sho1* (*Ssk2Δ Ssk22Δ*) branch simulation. **C:** Pbs2 distribution wild type simulation. **D:** Activation Hog1 simulation for both branches and the wild type for 0.1 M NaCl

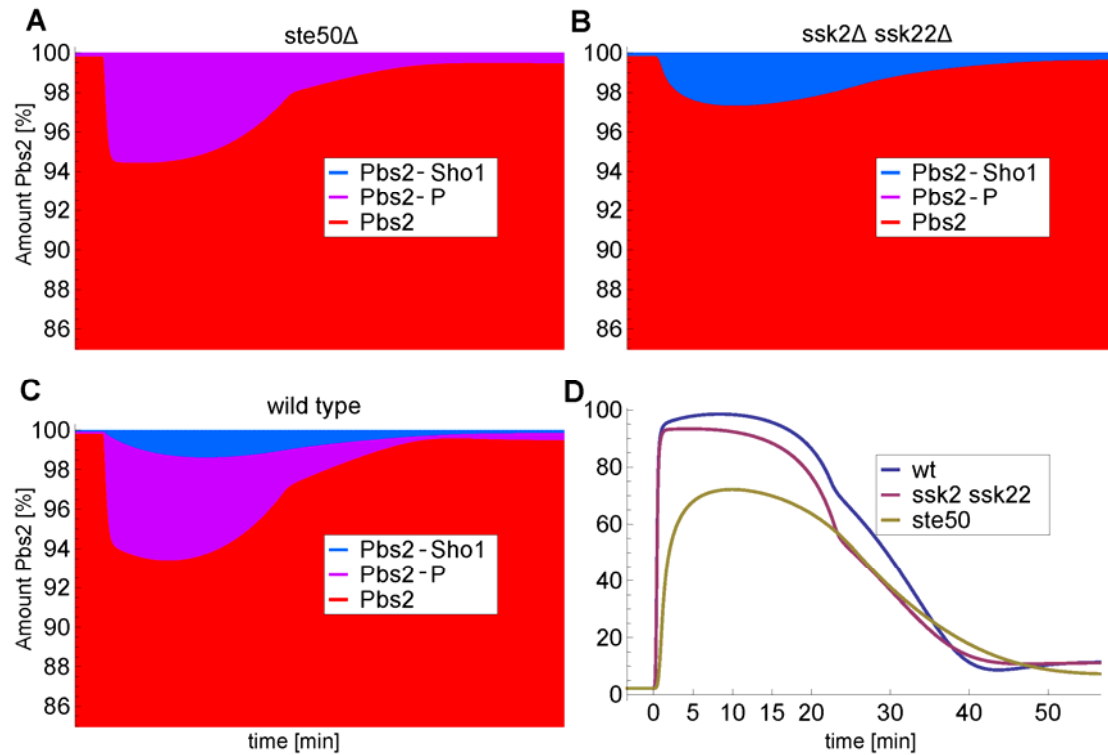

**Figure S9:** Pbs2 distribution and Hog1 activation for both branches and the wild type for 0.4 M NaCl. **A:** Pbs2 distribution Sln1-branch (*ste50Δ*) simulation. **B:** Pbs2 distribution Sho1 (*Ssk2Δ Ssk22Δ*) branch simulation. **C:** Pbs2 distribution wild type simulation. **D:** Activated Hog1 simulation for both branches and the wild type for 0.4 M NaCl

## 11 There is no perfect adaptation at the level of Hog1 phosphorylation

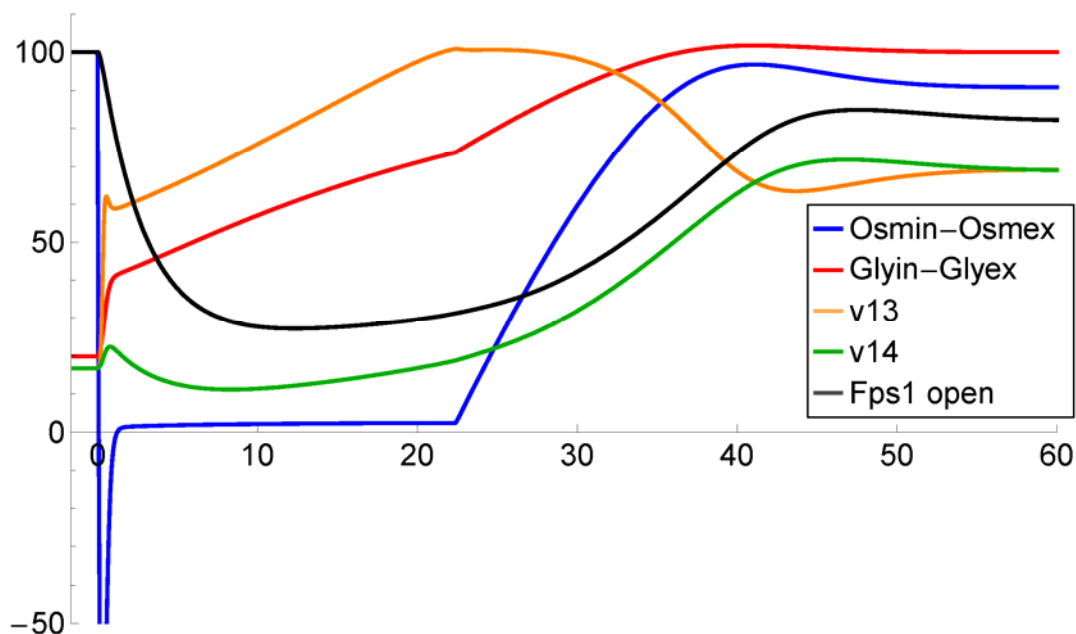

**Figure S10:** Dynamics of gradients and flows characterising osmolarity and glycerol in yeast upon an osmotic shock of 0.4 M NaCl scaled to maximum levels, respectively.

In the model, after adaptation the difference between internal and external osmolarity, which is equilibrated by turgor (Schaber, et al., 2010; Schaber and Klipp, 2008), returns almost to its initial values (Supplementary Figure S10, blue line). This, of course, is a prerequisite of volume adaptation. However, the glycerol flux across the membrane (see reaction  $v_{14}$  and Supplementary Material), which is proportional to the difference between internal and external glycerol, does not return to pre-shock levels. The difference between internal and external glycerol increases after adaptation (Supplementary Figure S10, red line), which is mainly due to the fact that in the model internal osmolarity is predominantly regulated by glycerol, whereas in the external medium leaking glycerol is drastically diluted. Accordingly, the simulated outflow increases, which in turn has to be balanced by an increase in the steady-state production (Supplementary Figure S10, orange and green lines). The data best supports a model in which glycerol production is a function of activated Hog1, both directly and indirectly by elevated protein production (see Figure 1 in the main text). Thus, the model suggests that elevated glycerol production can only be maintained by an elevated Hog1 activity. In a recent paper it was shown that perfect adaptation in terms of Hog1 activity can theoretically be achieved by maintaining the Fps1 channel in a closed state after adaptation (Schaber, et al., 2010). Here, however, a model was selected that assumes channel closure to be a function of turgor and Hog1 activity. Returning to almost the initial Fps1 state after adaptation (Supplementary Figure S10,



black line) renders the systems more flexible to react to subsequent shocks, at the cost of an elevated glycerol efflux that has to be maintained.

## 12 References

- Alon, U. (2007) *An Introduction to Systems Biology*. Mathematical and Computational Biology Series. Chapman and Hall/CRC, Boca Raton.
- Dihazi, H., Kessler, R. and Eschrich, K. (2004) High osmolarity glycerol (HOG) pathway-induced phosphorylation and activation of 6-phosphofructo-2-kinase are essential for glycerol accumulation and yeast cell proliferation under hyperosmotic stress, *J Biol Chem*, 279, 23961-23968. Epub 22004 Mar 23922.
- Eriksson, E., et al. (2007) A microfluidic system in combination with optical tweezers for analyzing rapid and reversible cytological alterations in single cells upon environmental changes, *Lab Chip*, 7, 71-76.
- Hersen, P., et al. (2008) Signal processing by the HOG MAP kinase pathway, *Proc Natl Acad Sci U S A*, 105, 7165-7170.
- Klipp, E., et al. (2005) Integrative model of the response of yeast to osmotic shock, *Nat Biotechnol*, 23, 975-982.
- Mettetal, J.T., et al. (2008) The frequency dependence of osmo-adaptation in *Saccharomyces cerevisiae*, *Science*, 319, 482-484.
- Raue, A., et al. (2009) Structural and practical identifiability analysis of partially observed dynamical models by exploiting the profile likelihood, *Bioinformatics*, 25, 1923-1929.
- Schaber, J. (2012) Easy parameter identifiability analysis with COPASI, *BioSystems*, accepted.
- Schaber, J., et al. (2010) Biophysical properties of *Saccharomyces cerevisiae* and their relationship with HOG pathway activation, *Eur Biophys J*, 39, 1547-1556.
- Schaber, J. and Klipp, E. (2008) Short-term volume and turgor regulation in yeast, *Essays Biochem*, 45, 147-159.
- Schaber, J. and Klipp, E. (2011) Model-based inference of biochemical parameters and dynamic properties of microbial signal transduction networks, *Curr Opin Biotechnol*, 22, 109-116.
- Seber, G.A.F. and Wild, C.J. (2003) *Nonlinear Regression*. Wiley-Interscience.

## 13 Supplementary Data

The source data for Supplementary Figure S2 is provided in a separate file.

The COPASI and SBML model together with data used by the COPASI model for fitting and ranking are also provided in a separate file.
